# Supplementary material for: Predictors of frailty among Chinese community-dwelling older adults with type 2 diabetes: a cross-sectional survey
Source: PubMed Central journal article supplement — BMJ Open. 2021 Mar 4;11(3):e041578. doi: 10.1136/bmjopen-2020-041578 (PMC7934736; doi:10.1136/bmjopen-2020-041578), 2021-03-04
Supplement: bmjopen-2020-041578.draft_revisions.pdf [file bmjopen-2020-041578.draft_revisions.pdf]

# BMJ Open

BMJ Open is committed to open peer review. As part of this commitment we make the peer review history of every article we publish publicly available.

When an article is published we post the peer reviewers' comments and the authors' responses online. We also post the versions of the paper that were used during peer review. These are the versions that the peer review comments apply to.

The versions of the paper that follow are the versions that were submitted during the peer review process. They are not the versions of record or the final published versions. They should not be cited or distributed as the published version of this manuscript.

BMJ Open is an open access journal and the full, final, typeset and author-corrected version of record of the manuscript is available on our site with no access controls, subscription charges or pay-per-view fees (<http://bmjopen.bmj.com>).

If you have any questions on BMJ Open's open peer review process please email [info.bmjopen@bmj.com](mailto:info.bmjopen@bmj.com)

# BMJ Open

## Predictors of frailty among Chinese community-dwelling older adults with type 2 diabetes: A cross-sectional survey

|                               |                                                                                                                                                                                                                                                                                                                                                                                                                                                                                                                                                                                                                                                                                                                                                   |
|-------------------------------|---------------------------------------------------------------------------------------------------------------------------------------------------------------------------------------------------------------------------------------------------------------------------------------------------------------------------------------------------------------------------------------------------------------------------------------------------------------------------------------------------------------------------------------------------------------------------------------------------------------------------------------------------------------------------------------------------------------------------------------------------|
| Journal:                      | <i>BMJ Open</i>                                                                                                                                                                                                                                                                                                                                                                                                                                                                                                                                                                                                                                                                                                                                   |
| Manuscript ID                 | bmjopen-2020-041578                                                                                                                                                                                                                                                                                                                                                                                                                                                                                                                                                                                                                                                                                                                               |
| Article Type:                 | Original research                                                                                                                                                                                                                                                                                                                                                                                                                                                                                                                                                                                                                                                                                                                                 |
| Date Submitted by the Author: | 15-Jun-2020                                                                                                                                                                                                                                                                                                                                                                                                                                                                                                                                                                                                                                                                                                                                       |
| Complete List of Authors:     | Kong, Linglin; Huazhong University of Science and Technology, Tongji Medical College, School of Nursing ; Hubei University Of Science and Technology, School of Nursing<br>Zhao, Huimin; Huazhong University of Science and Technology, Tongji Medical College, School of Nursing<br>Fan, Junyao; Huazhong University of Science and Technology, Tongji Medical College, School of Nursing<br>Wang, Quan; Huazhong University of Science and Technology, Tongji Medical College, School of Nursing<br>Li, Jie; Huazhong University of Science and Technology, Tongji Medical College, School of Nursing<br>Bai, Jinbing; Emory University,<br>Mao, Jing; Huazhong University of Science and Technology, Tongji Medical College, School of Nursing |
| Keywords:                     | GERIATRIC MEDICINE, PRIMARY CARE, General diabetes < DIABETES & ENDOCRINOLOGY                                                                                                                                                                                                                                                                                                                                                                                                                                                                                                                                                                                                                                                                     |
|                               |                                                                                                                                                                                                                                                                                                                                                                                                                                                                                                                                                                                                                                                                                                                                                   |

SCHOLARONE™  
Manuscripts

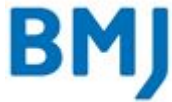

I, the Submitting Author has the right to grant and does grant on behalf of all authors of the Work (as defined in the below author licence), an exclusive licence and/or a non-exclusive licence for contributions from authors who are: i) UK Crown employees; ii) where BMJ has agreed a CC-BY licence shall apply, and/or iii) in accordance with the terms applicable for US Federal Government officers or employees acting as part of their official duties; on a worldwide, perpetual, irrevocable, royalty-free basis to BMJ Publishing Group Ltd ("BMJ") its licensees and where the relevant Journal is co-owned by BMJ to the co-owners of the Journal, to publish the Work in this journal and any other BMJ products and to exploit all rights, as set out in our [licence](#).

The Submitting Author accepts and understands that any supply made under these terms is made by BMJ to the Submitting Author unless you are acting as an employee on behalf of your employer or a postgraduate student of an affiliated institution which is paying any applicable article publishing charge ("APC") for Open Access articles. Where the Submitting Author wishes to make the Work available on an Open Access basis (and intends to pay the relevant APC), the terms of reuse of such Open Access shall be governed by a Creative Commons licence – details of these licences and which [Creative Commons](#) licence will apply to this Work are set out in our licence referred to above.

Other than as permitted in any relevant BMJ Author's Self Archiving Policies, I confirm this Work has not been accepted for publication elsewhere, is not being considered for publication elsewhere and does not duplicate material already published. I confirm all authors consent to publication of this Work and authorise the granting of this licence.

---

## Predictors of frailty among Chinese community-dwelling older adults with type 2

### diabetes: A cross-sectional survey

Linglin Kong,<sup>1,2</sup> Huimin Zhao,<sup>1</sup> Junyao Fan,<sup>1</sup> Quan Wang,<sup>1</sup> Jie Li,<sup>1</sup> Jinbing Bai,<sup>3</sup> Jing Mao<sup>1</sup>

<sup>1</sup>School of Nursing, Tongji Medical College, Huazhong University of Science and Technology, Wuhan, Hubei, China

<sup>2</sup>School of Nursing, Hubei University of Science and Technology, Xianning, Hubei, China

<sup>3</sup>Nell Hodgson Woodruff School of Nursing, Emory University, Atlanta, Georgia, USA

#### Corresponding authors:

Jie Li, MSN, PhD, RN

Associate Professor

E-mail: lijie@hust.edu.cn

Tel.: + 86 18971097091

Jing Mao, MD, PhD

Professor

E-mail: maojing@hust.edu.cn

Tel.: + 86 13317135988

**Word count:** 3596

---

## ABSTRACT

**Objectives:** To assess the prevalence of frailty and identify predictors of frailty among Chinese community-dwelling older adults with type 2 diabetes.

**Design:** A cross-sectional design.

**Setting:** Two community health centers in central China.

**Participants:** 291 community-dwelling older adults aged  $\geq 65$  years with type 2 diabetes.

**Main outcome measures:** Data were collected via face-to-face interviews, anthropometric measurements, laboratory tests and community health files. The main outcome measure was frailty assessed by the frailty phenotype criteria. The multivariate logistic regression model was used to identify the predictors of frailty.

**Results:** The prevalence of frailty was 19.2% for community-dwelling older adults with type 2 diabetes. The significant predictors of frailty included alcohol drinking (non-current drinker) (OR = 4.374, 95% CI 1.547 to 12.366), glycated hemoglobin (HbA1c) (OR = 1.374, 95% CI 1.105 to 1.709), nutritional status (malnutrition risk/malnutrition) (OR = 3.612, 95% CI 1.553 to 8.402), depression (OR = 1.141, 95% CI 1.008 to 1.291), exercise (OR = 0.886, 95% CI 0.823 to 0.953), and foot self-care behavior (OR = 0.891, 95% CI 0.815 to 0.975).

**Conclusions:** A high prevalence of frailty was found among older adults with type 2 diabetes in the Chinese community. Frailty identification and multi-faceted interventions should be developed with the consideration of proper glycemic control, nutritional instruction, depressive symptoms improvement, and self-care behaviors enhancement in this population.

---

## ARTICLE SUMMARY

### Strengths and limitations of this study

- This is the first study to explore the predictors of frailty among the community-dwelling older adults with type 2 diabetes in China.
- The study examined which domains of diabetes self-care behaviors were preferentially associated with frailty among diabetic older adults.
- The study is a cross-sectional study so the causal relationship of the associated factors with frailty could not be established.
- The study was conducted in one city of China, which may affect the generalizability of the findings.

### KEYWORDS

Community-dwelling older adults; frailty; predictors; type 2 diabetes.

## INTRODUCTION

Across the world, the estimated number of people aged 65–99 years with diabetes was 136 million (19.3%) in 2019, and this number will keep increasing to 195 million in 2030 and 276 million in 2045.<sup>1</sup> China has the world's largest number of adults with diabetes<sup>1</sup> and the prevalence of older Chinese adults with diabetes aged above 60 years was 20.2% in the latest national survey.<sup>2</sup> The elderly with type 2 diabetes are at risk for developing frailty,<sup>3</sup> a geriatric syndrome manifesting as reduced strength, endurance, and physiologic function that increases vulnerability for developing increased dependency and death.<sup>4</sup> Older people with diabetes were more likely to be frail than their non-diabetes counterparts.<sup>5,6</sup> This close relationship could be explained as the diabetes impairs the skeletal muscle function, vascular function, and hormonal milieu, as well as accelerates the sarcopenia providing the basis of frailty.<sup>3,7,8</sup>

Frailty is associated with higher disability, mortality, cardiovascular events and healthcare utilization among the older adults with type 2 diabetes.<sup>9,10</sup> Identifying the associated factors for frailty among older adults with diabetes may help to improve their health outcomes. A few studies have examined some influencing factors of frailty among diabetic older adults, primarily including sociodemographic, physical, and biological factors. Chhetri *et al*<sup>5</sup> identified that female, urban living, older age, comorbidity, high waist circumference, less house work, and not receiving medical consultation regularly were independent risk factors of frailty in Chinese community-dwelling pre-diabetic and diabetic population. Additionally, systolic blood pressure, albumin, glycated hemoglobin (HbA1c), high-density lipoprotein cholesterol, total cholesterol, triglycerides, bodyweight, and abdominal obesity contributed to

1  
2  
3  
4 the development of frailty in the diabetic elderly.<sup>6 11 12</sup> Until now, the important but  
5  
6 modifiable factors, including nutritional status, psychological and self-care behavioral  
7  
8 factors, were rarely studied among the community-dwelling diabetic older adults.  
9  
10

11 Based on the model of cycle of frailty,<sup>13</sup> malnutrition plays an important role in the  
12  
13 progression of frailty. The association between malnutrition and frailty has been established  
14  
15 among community-dwelling older adults.<sup>14 15</sup> Two-thirds of malnourished older adults were  
16  
17 physically frail, whereas approximately 10% of the physically frail population was  
18  
19 malnourished.<sup>14</sup> Many older adults with diabetes are at risk of malnutrition, which may stem  
20  
21 from an inappropriate diet or overly strict diet control.<sup>16</sup> Depression is another common factor  
22  
23 for frailty among the elderly.<sup>17 18</sup> A systematic review showed that the elderly with depression  
24  
25 had a higher risk of developing frailty (odds ratio [OR] = 4.07, 95% confidence interval [CI]  
26  
27 1.93 to 8.55).<sup>19</sup> There is a lack of understanding of the impact of malnutrition and depression  
28  
29 on frailty among the diabetic older people. Knowledge of these associations is useful for  
30  
31 designing optimum strategies for frailty prevention in those population.  
32  
33  
34  
35  
36  
37  
38  
39

40 Self-care behaviors were preventive factors for frailty, especially for the older adults who  
41  
42 were able to acquire and maintain appropriate health management methods or strengthen their  
43  
44 support system.<sup>20</sup> Diabetes self-care behaviors should be adopted by diabetic older adults to  
45  
46 control their disease, referring to proper diet, regular exercise, self-monitoring blood glucose,  
47  
48 checking one's foot, and taking medicine on time.<sup>21</sup> However, there is a dearth of studies on  
49  
50 which domains of diabetes self-care behaviors are preferentially associated with frailty.  
51  
52  
53 Examining the associations is important for developing specific interventions focusing on  
54  
55  
56 self-management behaviors to reduce the risk of frailty.  
57  
58  
59  
60



1  
2  
3  
4 There is a common sense among key stakeholders including the older adults and health  
5  
6 care practitioners that it is impossible to prevent frailty.<sup>22</sup> In fact, frailty can be reversible or  
7  
8 attenuated by appropriate interventions.<sup>4</sup> In China, there are more older people with type 2  
9  
10 diabetes living in the community, and the health management of diabetic elderly is the focus  
11  
12 of community health services, which still do not include frailty screening and management.<sup>23</sup>  
13  
14 Little is known about the frailty status among the community-dwelling older adults with type  
15  
16 2 diabetes in China. Therefore, the purposes of this study were to assess the prevalence of  
17  
18 frailty and explore the predictors of frailty among Chinese community-dwelling older adults  
19  
20 with type 2 diabetes.  
21  
22  
23  
24  
25  
26  
27  
28  
29

## 30 **METHODS**

### 31 **Study design and setting**

32  
33 A cross-sectional design was used. The participants were recruited from two community  
34  
35 health centers of Xianning City of Hubei Province in China from June to October 2019. Both  
36  
37 community health centers provided primary health care services for older people in urban and  
38  
39 rural communities.  
40  
41  
42  
43  
44

### 45 **Participants**

46  
47 Older adults with type 2 diabetes were identified from the electronic community health files  
48  
49 of the two community health centers. The inclusion criteria of this study were people who  
50  
51 were: (1) 65 years old or above and living in the community; (2) diagnosed with type 2  
52  
53 diabetes confirmed by the physician based on the World Health Organization diagnostic  
54  
55 criteria, 1999; (3) with 6 months or longer for duration of diabetes after diagnosed; and (4)  
56  
57  
58  
59  
60

able to walk independently. The diabetic older adults were excluded if they: (1) were unable to communicate with the investigators; (2) had dementia or mental health disorders; and (3) had acute diabetic complications.

The sample size was calculated using the formula for cross-sectional studies,<sup>24</sup>  $n = \frac{Z^2 P(1-P)}{d^2}$ . Where n is the sample size, Z is the statistic corresponding to level of confidence, P is expected prevalence, and d is precision. Hence, we assumed a confidence level of 95.0%, expected frailty prevalence of 20.0% for community-dwelling older adults with type 2 diabetes (determined by the presurvey), and precision of 5.0%, at least 246 participants were needed for this study.

### Survey instrument

The self-designed personal information questionnaire was used to collect the participants' characteristics. The sociodemographic characteristics included age, gender, living place, education level, marital status, living status, working status, personal monthly income, and medical insurance; the lifestyle and clinical characteristics contained smoking, alcohol drinking, sleep duration at night, self-rated quality of sleep, duration of diabetes, number of comorbidities, polypharmacy, body mass index (BMI), waist circumference, and HbA1c. Polypharmacy was defined as concurrent use of 5 or more drugs. BMI was calculated by  $\text{weight (kg)} / [\text{height (m)}]^2$  and classified as underweight, normal, overweight, and obesity (< 18.5, 18.5-23.9, 24.0-27.9, and  $\geq 28.0$  kg/m<sup>2</sup>), and high waist circumference was defined as  $\geq 85$  cm in men and  $\geq 80$  cm in women.<sup>25</sup>

Frailty was measured using the modified frailty phenotype criteria, which was based on the phenotypic criteria proposed by Fried *et al.*<sup>13</sup> Participants meeting 3 or more of the following

5 criteria were identified as frailty: (1) Unintentional weight loss: weight loss  $\geq 4.5$ kg in the past year, not due to dieting and exercise; (2) Exhaustion: It was identified based on a response of “3-4 days or most of the time a week” to either of the two questions: “I felt that everything I did was an effort” and “I could not get going”; (3) Slowness: average walking speed was tested by asking the participants to walk 6 meters for twice with usual pace. Slowness was identified by walking speed for men ( $\leq 0.89$ m/s) and women ( $\leq 0.79$ m/s)<sup>26</sup>; (4) Weakness: grip strength was measured with a dynamometer three times on each hand, and the maximum of the readings was used. Weakness was judged by grip strength for men ( $\leq 28$ kg) and women ( $\leq 18$ kg)<sup>26</sup>; and (5) Low physical activity: the Chinese version of Physical Activity Scale for the Elderly (PASE)<sup>27</sup> was used to assess participants’ physical activity level in the past week. Low physical activity was classified by PASE score for men ( $\leq 56.4$ ) and women ( $\leq 58.8$ ).<sup>26</sup>

Mini-Nutritional Assessment (MNA) was used to assess the nutritional status of older adults.<sup>28</sup> It consists of 18 items grouped into four parts: anthropometric assessment, general assessment, dietary assessment and self-assessment. The total score ranges from 0 to 30 and is used to classify the elderly as well-nourished ( $\geq 24$ ), at risk of malnutrition (17–23.5), or malnourished ( $< 17$ ). The Chinese version of MNA has been proven to be reliable and valid in community-dwelling older population.<sup>29</sup>

Geriatric Depression Scale-15 (GDS-15) was used to evaluate the depressive symptoms of older adults.<sup>30</sup> The scale contains 15 items that require the subjects to answer with “yes” or “no”. The maximum score of the scale is 15 and a higher score indicates more severe

depressive symptoms. The Chinese version of GDS-15 is a reliable and valid screening tool for assessing geriatric depression in Chinese population.<sup>31</sup>

The Chinese version of Summary of Diabetes Self-Care Activities (SDSCA)<sup>32</sup> was used to measure self-care behaviors of the older adults with type 2 diabetes, which was modified from the original SDSCA.<sup>21</sup> It is a brief self-report questionnaire that includes 11 items assessing the following aspects: general diet, specific diet, exercise, blood-glucose testing, foot care, and medication care in the past week. The total score of this scale ranges from 0 to 77 and a higher score indicates better diabetes self-care behaviors. It showed good validity and test-retest reliability in Chinese patients with type 2 diabetes.<sup>32</sup>

Anthropometric measurements, including height or knee height, weight, mid-arm circumference, calf circumference and waist circumference, were measured strictly adhering to the measurement manual by the trained investigators. The knee height was measured and converted to the estimated height with specific equations<sup>33</sup> for the older adults with severe spinal curvature. HbA1c measurement was administered by the laboratory in the community health centers.

### **Data collection and ethical considerations**

Ethical Approval was obtained prior to data collection. The researcher contacted the directors of two community health centers and explained the aims of this study. After permission was granted, the public health nurses and physicians were invited to assist with data collection.

They helped to recruit participants mainly through a phone call, informing the eligible diabetic older adults of the study purpose, and then invited the older adults to the community health centers to complete the survey if consented to participate. In addition, when older

1  
2  
3  
4 adults with type 2 diabetes went to the community health centers for physical check-up,  
5  
6 follow-up blood glucose monitoring or health education, they were also invited to participate  
7  
8 in this study if eligible. Once the written informed consent was obtained from each  
9  
10 participant, the survey was administered by trained investigators. The information in this  
11  
12 survey was obtained from the participants' self-reporting, anthropometric measurements and  
13  
14 laboratory test results, supplemented by the community health files.  
15  
16  
17  
18

### 19 **Data analysis**

20  
21 The SPSS version 21.0 (SPSS Inc., Chicago, IL, USA) was used for data analysis. Frailty was  
22  
23 defined as the dependent variable with 1 = frail ( $\geq 3$  on the frailty phenotype criteria) and 0 =  
24  
25 non-frail ( $< 3$ ). Sociodemographic, lifestyle and clinical characteristics, malnutrition,  
26  
27 depression, and diabetes self-care behaviors were considered potential factors for frailty.  
28  
29 Raw data were evaluated for normality and multi-collinearity before data analysis. Data were  
30  
31 described as n (%) for categorical variables and median (P<sub>25</sub>–P<sub>75</sub>) or mean  $\pm$  SD for  
32  
33 continuous variables. To test the statistic difference between frail and non-frail group,  
34  
35 univariate analyses were conducted using chi-square test for categorical variables and Mann-  
36  
37 Whitney U test for continuous variables. Binary logistic regression with the Wald method of  
38  
39 backward elimination was performed to identify the predictors of frailty. The statistical  
40  
41 significance was set at  $P < 0.05$  for all tests. Variables with a value of  $P < 0.05$  in the  
42  
43 univariate analyses were included in the logistic regression.  
44  
45  
46  
47  
48  
49  
50  
51  
52

### 53 **Patient and public involvement**

54  
55  
56  
57  
58  
59  
60

1  
2  
3  
4 Patients were not involved in the development of research question or the design of the study.  
5  
6

7 Anthropometric measurements and HbA1c test results were provided to the participants,  
8  
9 community physicians and nurses.  
10  
11

## 12 13 14 **RESULTS**

15  
16 As shown in figure1, a total of 302 eligible older adults consented to participate in this study.  
17  
18 Eleven participants did not complete the questionnaires due to temporary issues and limited  
19  
20 time, so the final sample consisted of 291 participants. Among these participants, 235  
21  
22 (80.8%) were non-frail and 56 (19.2%) were frail.  
23  
24

### 25 26 27 **Characteristics of the participants**

28  
29 The median age of participants was 69 years (interquartile range [IQR] 67-72), with a range  
30  
31 from 65 to 85 years. The majority of the participants were female (52.9%), living in urban  
32  
33 area (84.5%), had junior high school or higher education (63.9%), had a spouse (80.1%),  
34  
35 living with others (86.9%), retired (73.9%), with a personal monthly income below 3000  
36  
37 yuan (66.3%) and had urban employees' insurance (58.1%) (table 1).  
38  
39  
40  
41

42  
43 Regarding the lifestyle characteristics, most of the participants were non-current smokers  
44  
45 (87.3%), non-current drinkers (73.2%), with 5-8 h sleep duration at night per day (66.0%),  
46  
47 and had good/very good sleep quality (61.2%) (table 2). Considering clinical characteristics,  
48  
49 the median duration of diabetes and median number of comorbidities was 10 years (IQR 4-  
50  
51 16) and 5 (IQR 3-6), respectively. Of the participants, 29.6% had polypharmacy; 43.6% with  
52  
53 normal BMI; and 17.5% with normal waist circumference. The median score of HbA1c was  
54  
55 6.66% (IQR 5.87-7.47) (table 2).  
56  
57  
58  
59  
60

### **Malnutrition, depression, and diabetes self-care behaviors**

Of the participants, 96 (33.0%) were at risk of malnutrition, 6 (2.1%) were malnourished and 189 (64.9%) were nourished. The median score of depression was 3 (IQR 1-5). The total score of diabetes self-care behaviors ranged from 12 to 70, with an average of  $40.25 \pm 10.08$ . Among the 6 sub-dimensions of diabetes self-care behaviors, the two dimensions with the lowest level were blood-glucose testing (0 [0-2]) and foot care (0 [0-7]) (table 3).

### **Univariate analyses for influencing factors of frailty**

Significant sociodemographic differences within groups (non-frail vs. frail) were found for education level ( $p = 0.010$ ), working status ( $p < 0.001$ ), personal monthly income ( $p = 0.007$ ), and medical insurance ( $p = 0.013$ ) (table 1). Regarding the lifestyle and clinical characteristics, significant group differences included alcohol drinking ( $p = 0.002$ ), sleep duration at night ( $p = 0.029$ ), self-rated sleep quality ( $p = 0.039$ ), comorbidities ( $p = 0.040$ ), polypharmacy ( $p = 0.036$ ), and HbA1c ( $p = 0.031$ ) (table 2). As shown in table 3, significant group differences were noted for malnutrition risk/malnutrition ( $p < 0.001$ ), depression ( $p < 0.001$ ), exercise ( $p < 0.001$ ), foot care ( $p = 0.004$ ), and medication care ( $p = 0.026$ ).

### **Predictors of frailty**

The multiple logistic regression revealed six predictors of frailty for older adults with type 2 diabetes in this study, including alcohol drinking (non-current drinker) (OR = 4.374, 95% CI 1.547 to 12.366), HbA1c (OR = 1.374, 95% CI 1.105 to 1.709), nutritional status (malnutrition risk/malnutrition) (OR = 3.612, 95% CI 1.553 to 8.402), depression (OR = 1.141, 95% CI 1.008 to 1.291), exercise (OR = 0.886, 95% CI 0.823 to 0.953), and foot care (OR = 0.891, 95% CI 0.815 to 0.975) (table 4). The model achieved overall significance ( $X^2$

(6) = 83.286,  $p < 0.001$ ) and had an overall classification accuracy of 83.5%. The Hosmer and Lemeshow test showed the model fit the data well ( $X^2(8) = 4.898$ ,  $p = 0.768$ ).

## DISCUSSION

This is the first study to explore the predictors of frailty among the community-dwelling older adults with type 2 diabetes in China. This study found that alcohol drinking, HbA1c, nutritional status, depression, exercise and foot self-care behavior were significant predictors of frailty in community-dwelling diabetic older adults.

The prevalence of frailty was 19.2% among this population by using the Fried frailty phenotype criteria, which focused on physical frailty. Our result was comparable with the Beijing study,<sup>5</sup> which showed the community-dwelling diabetic population had the prevalence (19.32%) of frailty. The Beijing study applied the accumulation of deficits method (Frailty Index  $\geq 0.25$ ) to measure frailty among the diabetic people aged  $\geq 55$  years.<sup>5</sup> By using the Fried frailty phenotype for assessing frailty, the prevalence of frailty in people with diabetes older than 65 years were 25.0%-32.0% as reported in the American studies.<sup>13 34</sup> However, the studies conducted in Singapore and Spain showed lower frailty prevalence of 8.2% and 11.2%, respectively.<sup>6 10</sup> These differences in prevalence of frailty can be explained by that the two Western studies recruited younger diabetic older adults, who may be in a better physical condition.

Alcohol drinking was one predictor of frailty among the diabetic older adults, and the frailty risk was significantly higher among non-current drinkers. Surprisingly, alcohol use had a negative association with physical frailty, which has been reported among older adults



1  
2  
3  
4 in previous studies.<sup>6 35-37</sup> This association could be explained by the “sick quitter” effect. The  
5  
6 diabetic older adults in poor health may reduce alcohol consumption or quit drinking, so the  
7  
8 ex-drinker group may contain people who were previous alcoholism or with a poor health  
9  
10 condition, while current drinker group may include healthier individuals.<sup>38</sup> Nevertheless, a  
11  
12 recent study demonstrated moderate alcohol consumption may protect against frailty through  
13  
14 an anti-inflammatory mechanism, which elucidated C-reactive protein level partially  
15  
16 mediated the relationship between moderate alcohol use and physical frailty.<sup>39</sup>  
17  
18  
19  
20  
21

22 Elevated HbA1c was associated with an increased risk of physical frailty among  
23  
24 community-dwelling diabetic older adults, which was consistent with the previous study in  
25  
26 diabetic older people.<sup>6</sup> Hyperglycemia could contribute to physical frailty through several  
27  
28 potential mechanisms, such as increasing microvascular damage<sup>40</sup> or causing skeletal muscle  
29  
30 mitochondrial dysfunction.<sup>41</sup> In contrast, Yanagita *et al*<sup>11</sup> reported low level of HbA1c was  
31  
32 associated with frailty measured by the Clinical Frailty Scale (CFS) among the diabetic older  
33  
34 adults. Zaslavsky *et al*<sup>42</sup> found a U-shaped relationship between glucose levels and physical  
35  
36 frailty in older adults with diabetes, with the lowest risk of frailty at HbA1c levels of 7.6%.  
37  
38 Overall, poor glucose control with hyperglycemia or hypoglycemia may increase the risk of  
39  
40 frailty. Therefore, optimal glycemic control needs to be individually determined for older  
41  
42 adults with type 2 diabetes.<sup>43</sup>  
43  
44  
45  
46  
47  
48  
49

50 Malnutrition led to physical frailty among community-dwelling older adults with type 2  
51  
52 diabetes, which was comparable with the findings of a Spanish study.<sup>12</sup> In this study, 35.1%  
53  
54 of our participants were at risk of malnutrition or malnourished and 52.6% of them were  
55  
56 overweight or obesity. However, 39 (38.2%) of participants who had malnutrition risk or with  
57  
58  
59  
60

malnutrition in this study were classified as either overweight or obesity. This result suggests that the diabetic elderly can suffer from malnutrition status even if they are overweight or obesity. Malnutrition is prevalent in diabetic older adults<sup>44 45</sup> due to various reasons, such as ageing-related appetite reductions, swallowing difficulties, limited mobility, and overly dietary restrictions.<sup>16</sup> We found that 45.4% of the diabetic older adults scored 0 point on the item of protein intake in this study, indicating that those people might be in insufficient protein intake. Although malnutrition and physical frailty share some common screening items and physiology, they are not interchangeable syndromes, and community-dwelling diabetic older people with malnutrition were more prone to be physically frail. It would be effective to prevent the physical frailty by screening the nutritional status of the diabetic older adults and providing them appropriate dietary instructions in community.

Consistent with previous studies among older population,<sup>17 18</sup> this study highlighted the significant impact of depression on frailty among the diabetic elderly. Recent evidence showed a reciprocal interaction between depression and frailty in older adults.<sup>19</sup> Depression contributes to physical frailty due to the decrease in physical activities or weight loss, and in turn, physical frailty may cause functional dependence or disability, and thus leads to depression. Diabetes can cause depression, which is a common condition in the people with type 2 diabetes, especially in the elderly.<sup>46 47</sup> Therefore, appropriate management of depressive symptoms should be an urgent need to help slow the progression of physical frailty in the elderly with type 2 diabetes in the community.

We found exercise and foot self-care behavior were protective factors for frailty among community-dwelling diabetic older adults. A higher score of exercise behavior was

1  
2  
3  
4 associated with a lower risk of physical frailty. Exercise can help reduce frailty through  
5  
6 mechanisms of decreasing muscle inflammation, promoting anabolism, and increasing  
7  
8 muscle protein synthesis.<sup>48</sup> The education programs for exercise training were effective to  
9  
10 improve frailty in the elderly.<sup>49</sup> Pariser *et al*<sup>50</sup> conducted a diabetes self-management  
11  
12 education program, comprising ten weeks aerobic and resistance exercise training, which  
13  
14 effectively reduced the HbA1c and frailty in diabetic older adults. In this study, most of the  
15  
16 participants adhered to oral medication or insulin injection every day in the past week, while  
17  
18 most of them did not attach importance to blood glucose monitoring and foot care. It is  
19  
20 interesting that foot self-care behavior was a predictor of frailty in this study. It can be  
21  
22 explained by that the participants with a higher score on foot care were more likely to be  
23  
24 active in self-management for complications prevention and concerned about their own  
25  
26 health, contributing to reduce the risk of frailty. In addition, the adherence to medication  
27  
28 among the non-frail participants was better than those with frailty, and a significant group  
29  
30 difference was found in this study. The association between frailty and medication care may  
31  
32 be explained by that the adherence to medication is directly associated with the control of  
33  
34 blood glucose, which has an impact on the progression of frailty.  
35  
36  
37  
38  
39  
40  
41  
42  
43  
44

45 This study has several limitations. First, this study is a cross-sectional study so the causal  
46  
47 relationship of the associated factors with frailty could not be established. Second,  
48  
49 information such as the older adults' physical activities and self-care behaviors were self-  
50  
51 reported, so it may be subjected to potential recall bias. Third, we excluded the older adults  
52  
53 who could not walk independently, and with severe vision and hearing problems, so findings  
54  
55 may not be generalizable to a more heterogeneous population. The effect of factors on frailty  
56  
57  
58  
59  
60

1  
2  
3  
4 among the community-dwelling diabetic older adults should be explored using prospective  
5  
6 longitudinal design with a larger sample size in the future.  
7  
8  
9

## 10 11 **CONCLUSIONS**

12  
13  
14 The older adults with type 2 diabetes are at a high risk of frailty in the community of China.  
15  
16 Being a non-current alcohol drinker, a higher level of HbA1c, malnutrition, and more  
17  
18 depressive symptoms were risk factors of frailty among the community-dwelling diabetic  
19  
20 older adults; exercise and foot self-care behavior were protective factors of frailty. The  
21  
22 findings of this study could facilitate future studies to implement targeted and suitable  
23  
24 interventions for frailty among community-dwelling diabetic older adults.  
25  
26  
27  
28  
29  
30  
31  
32  
33  
34

## 35 **Acknowledgements**

36  
37 The authors thank the administrators, public health nurses and physicians in the two  
38  
39 community health centers for assisting with data collection and all the older adults for  
40  
41 participating in this study.  
42  
43  
44  
45  
46  
47

## 48 **Author Contributions**

49  
50 LK, JL and JM designed the study. LK, HZ and QW collected and managed the data. LK and  
51  
52 JF completed the data analysis. LK and JL drafted the manuscript. JB checked and revised  
53  
54 the manuscript. All the authors read and approved the final manuscript.  
55  
56  
57  
58  
59  
60

---

## **Funding**

This study was supported by National Natural Science Foundation of China (No. 71503088).

## **Competing interests**

None declared.

## **Patient consent for publication**

Obtained.

## **Ethics approval**

This study was approved by the Medical Ethics Committee of Huazhong University and Science and Technology (No. 2019–S941).

## **Data availability statement**

Data are available from the first author upon reasonable request. All data relevant to this study are included in the article.

---

## REFERENCES

1. International Diabetes Federation. IDF diabetes atlas 9th edition. 2019. Available:  
<https://www.diabetesatlas.org>.
2. Wang L, Gao P, Zhang M, *et al*. Prevalence and Ethnic Pattern of Diabetes and Prediabetes in China in 2013. *Jama* 2017;317:2515-23.
3. Assar ME, Laosa O, Rodriguez Manas L. Diabetes and frailty. *Curr Opin Clin Nutr Metab Care* 2019;22:52-57.
4. Morley JE, Vellas B, van Kan GA, *et al*. Frailty consensus: a call to action. *J Am Med Dir Assoc* 2013;14:392-7.
5. Chhetri JK, Zheng Z, Xu X, *et al*. The prevalence and incidence of frailty in Pre-diabetic and diabetic community-dwelling older population: results from Beijing longitudinal study of aging II (BLSA-II). *BMC Geriatr* 2017;17:47.
6. Garcia-Esquinas E, Graciani A, Guallar-Castillon P, *et al*. Diabetes and risk of frailty and its potential mechanisms: a prospective cohort study of older adults. *J Am Med Dir Assoc* 2015;16:748-54.
7. Sinclair AJ, Abdelhafiz AH, Rodriguez-Manas L. Frailty and sarcopenia - newly emerging and high impact complications of diabetes. *J Diabetes Complications* 2017;31:1465-73.
8. Umegaki H. Sarcopenia and frailty in older patients with diabetes mellitus. *Geriatr Gerontol Int* 2016;16:293-9.

- 1  
2  
3  
4 9. Chao CT, Wang J, Chien KL. Both pre-frailty and frailty increase healthcare utilization  
5  
6 and adverse health outcomes in patients with type 2 diabetes mellitus. *Cardiovasc*  
7  
8 *Diabetol* 2018;17:130.  
9  
10
- 11 10. Thein FS, Li Y, Nyunt MSZ, *et al.* Physical frailty and cognitive impairment is associated  
12  
13 with diabetes and adversely impact functional status and mortality. *Postgrad Med*  
14  
15 2018;130:561-67.  
16  
17
- 18 11. Yanagita I, Fujihara Y, Eda T, *et al.* Low glycated hemoglobin level is associated with  
19  
20 severity of frailty in Japanese elderly diabetes patients. *J Diabetes Investig*  
21  
22 2018;9:419-25.  
23  
24
- 25 12. Casals C, Casals Sanchez JL, Suarez Cadenas E, *et al.* [Frailty in older adults with type 2  
26  
27 diabetes mellitus and its relation with glucemic control, lipid profile, blood pressure,  
28  
29 balance, disability grade and nutritional status]. *Nutr Hosp* 2018;35:820-26.  
30  
31
- 32 13. Fried LP, Tangen CM, Walston J, *et al.* Frailty in older adults: evidence for a phenotype.  
33  
34 *J Gerontol A Biol Sci Med Sci* 2001;56:M146-56.  
35  
36
- 37 14. Verlaan S, Ligthart-Melis GC, Wijers SLJ, *et al.* High Prevalence of Physical Frailty  
38  
39 Among Community-Dwelling Malnourished Older Adults-A Systematic Review and  
40  
41 Meta-Analysis. *J Am Med Dir Assoc* 2017;18:374-82.  
42  
43
- 44 15. Wei K, Nyunt MSZ, Gao Q, *et al.* Frailty and Malnutrition: Related and Distinct  
45  
46 Syndrome Prevalence and Association among Community-Dwelling Older Adults:  
47  
48 Singapore Longitudinal Ageing Studies. *J Am Med Dir Assoc* 2017;18:1019-28.  
49  
50
- 51 16. McClinchy J. Dietary management of older people with diabetes. *Br J Community Nurs*  
52  
53 2018;23:248-51.  
54  
55  
56  
57  
58  
59  
60

- 
- 1  
2  
3  
4 17. Aprahamian I, Suemoto CK, Lin SM, *et al.* Depression is associated with self-rated frailty  
5  
6 in older adults from an outpatient clinic: a prospective study. *Int Psychogeriatr*  
7  
8  
9 2019;31:425-34.  
10  
11 18. Doi T, Makizako H, Tsutsumimoto K, *et al.* Transitional status and modifiable risk of  
12  
13 frailty in Japanese older adults: A prospective cohort study. *Geriatr Gerontol Int*  
14  
15 2018;18:1562-66.  
16  
17 19. Soysal P, Veronese N, Thompson T, *et al.* Relationship between depression and frailty in  
18  
19 older adults: A systematic review and meta-analysis. *Ageing Res Rev* 2017;36:78-87.  
20  
21 20. Tanimura C, Matsumoto H, Tokushima Y, *et al.* Self-care agency, lifestyle, and physical  
22  
23 condition predict future frailty in community-dwelling older people. *Nurs Health Sci*  
24  
25 2018;20:31-38.  
26  
27 21. Toobert DJ, Hampson SE, Glasgow RE. The summary of diabetes self-care activities  
28  
29 measure: results from 7 studies and a revised scale. *Diabetes Care* 2000;23:943-50.  
30  
31 22. Shaw R, Gwyther H, Holland C, *et al.* Understanding frailty: meanings and beliefs about  
32  
33 screening and prevention across key stakeholder groups in Europe. *Ageing and*  
34  
35 *Society* 2018;38:1223-52.  
36  
37 23. Cai C, Jia WP. Community healthcare for diabetes in China (In Chinese). *Scientia*  
38  
39 *Sinica(Vitae)* 2018;48:820-26.  
40  
41 24. Pourhoseingholi MA, Vahedi M, Rahimzadeh M. Sample size calculation in medical  
42  
43 studies. *Gastroenterol Hepatol Bed Bench* 2013;6:14-7.  
44  
45 25. Zhou BF. Predictive values of body mass index and waist circumference for risk factors  
46  
47 of certain related diseases in Chinese adults--study on optimal cut-off points of body  
48  
49  
50  
51  
52  
53  
54  
55  
56  
57  
58  
59  
60



- 1  
2  
3  
4 mass index and waist circumference in Chinese adults. *Biomed Environ Sci*  
5  
6 2002;15:83-96.  
7  
8  
9 26. Auyeung TW, Lee JS, Leung J, *et al.* The selection of a screening test for frailty  
10  
11 identification in community-dwelling older adults. *J Nutr Health Aging* 2014;18:199-  
12  
13 203.  
14  
15  
16 27. Wu CY, Su TP, Fang CL, *et al.* Sleep quality among community-dwelling elderly people  
17  
18 and its demographic, mental, and physical correlates. *J Chin Med Assoc* 2012;75:75-  
19  
20 80.  
21  
22  
23 28. Guigoz Y, Vellas B, Garry PJ. Assessing the nutritional status of the elderly: The Mini  
24  
25 Nutritional Assessment as part of the geriatric evaluation. *Nutr Rev* 1996;54:S59-65.  
26  
27  
28 29. Han Y, Li S, Zheng Y. Predictors of nutritional status among community-dwelling older  
29  
30 adults in Wuhan, China. *Public Health Nutr* 2009;12:1189-96.  
31  
32  
33 30. Sheikh JI, Yesavage JA. Geriatric Depression Scale (GDS): Recent evidence and  
34  
35 development of a shorter version. *Clinical Gerontologist* 1986;5:165-73.  
36  
37  
38 31. Lee H-cB, Chiu HFK, Kowk WY, *et al.* Chinese elderly and the GDS short form: A  
39  
40 preliminary study. *Clinical Gerontologist* 1993;14:37-42.  
41  
42  
43 32. Wan QQ, Shang SM, Lai XB, *et al.* Study on the reliability and validity of summary of  
44  
45 diabetes self-care activities for type 2 diabetes patients (In Chinese). *Chin J Prac Nurs*  
46  
47 2008;24:26-27.  
48  
49  
50  
51  
52 33. Li ET, Tang EK, Wong CY, *et al.* Predicting stature from knee height in Chinese elderly  
53  
54 subjects. *Asia Pac J Clin Nutr* 2000;9:252-5.  
55  
56  
57  
58  
59  
60

- 1  
2  
3  
4 34. Ottenbacher KJ, Graham JE, Al Snih S, *et al.* Mexican Americans and frailty: findings  
5  
6 from the Hispanic established populations epidemiologic studies of the elderly. *Am J*  
7  
8 *Public Health* 2009;99:673-9.  
9  
10  
11 35. Ortola R, Garcia-Esquinas E, Leon-Munoz LM, *et al.* Patterns of Alcohol Consumption  
12  
13 and Risk of Frailty in Community-dwelling Older Adults. *J Gerontol A Biol Sci Med*  
14  
15 *Sci* 2016;71:251-8.  
16  
17  
18 36. Shah M, Paulson D, Nguyen V. Alcohol Use and Frailty Risk among Older Adults over  
19  
20 12 Years: The Health and Retirement Study. *Clin Gerontol* 2018;41:315-25.  
21  
22  
23 37. Kojima G, Jivraj S, Iliffe S, *et al.* Alcohol Consumption and Risk of Incident Frailty: The  
24  
25 English Longitudinal Study of Aging. *J Am Med Dir Assoc* 2019;20:725-29.  
26  
27  
28 38. Kojima G, Liljas A, Iliffe S, *et al.* A systematic review and meta-analysis of prospective  
29  
30 associations between alcohol consumption and incident frailty. *Age Ageing*  
31  
32 2018;47:26-34.  
33  
34  
35 39. Shah M, Paulson D. C-reactive protein level partially mediates the relationship between  
36  
37 moderate alcohol use and frailty: the Health and Retirement Study. *Age Ageing*  
38  
39 2016;45:874-78.  
40  
41  
42 40. Sheetz MJ, King GL. Molecular understanding of hyperglycemia's adverse effects for  
43  
44 diabetic complications. *Jama* 2002;288:2579-88.  
45  
46  
47 41. Phielix E, Schrauwen-Hinderling VB, Mensink M, *et al.* Lower intrinsic ADP-stimulated  
48  
49 mitochondrial respiration underlies in vivo mitochondrial dysfunction in muscle of  
50  
51 male type 2 diabetic patients. *Diabetes* 2008;57:2943-9.  
52  
53  
54  
55  
56  
57  
58  
59  
60

- 1  
2  
3  
4 42. Zaslavsky O, Walker RL, Crane PK, *et al.* Glucose Levels and Risk of Frailty. *J Gerontol*  
5  
6 *A Biol Sci Med Sci* 2016;71:1223-9.  
7  
8  
9 43. Mathur S, Zammitt NN, Frier BM. Optimal glycaemic control in elderly people with type  
10  
11 2 diabetes: what does the evidence say? *Drug Saf* 2015;38:17-32.  
12  
13  
14 44. Liu GX, Chen Y, Yang YX, *et al.* Pilot study of the Mini Nutritional Assessment on  
15  
16 predicting outcomes in older adults with type 2 diabetes. *Geriatr Gerontol Int*  
17  
18 2017;17:2485-92.  
19  
20  
21 45. Vischer UM, Perrenoud L, Genet C, *et al.* The high prevalence of malnutrition in elderly  
22  
23 diabetic patients: implications for anti-diabetic drug treatments. *Diabet Med*  
24  
25 2010;27:918-24.  
26  
27  
28 46. Park M, Reynolds CF, 3rd. Depression among older adults with diabetes mellitus. *Clin*  
29  
30 *Geriatr Med* 2015;31:117-37, ix.  
31  
32  
33 47. Darwish L, Beroncal E, Sison MV, *et al.* Depression in people with type 2 diabetes:  
34  
35 current perspectives. *Diabetes Metab Syndr Obes* 2018;11:333-43.  
36  
37  
38 48. Aguirre LE, Villareal DT. Physical Exercise as Therapy for Frailty. *Nestle Nutr Inst*  
39  
40 *Workshop Ser* 2015;83:83-92.  
41  
42  
43 49. de Labra C, Guimaraes-Pinheiro C, Maseda A, *et al.* Effects of physical exercise  
44  
45 interventions in frail older adults: a systematic review of randomized controlled trials.  
46  
47 *BMC Geriatr* 2015;15:154.  
48  
49  
50 50. Pariser G, Hager K, Gillette P, *et al.* Active steps for diabetes: a community-campus  
51  
52 partnership addressing frailty and diabetes. *Diabetes Educ* 2014;40:60-7.  
53  
54  
55  
56  
57  
58  
59  
60

**Table 1** Sociodemographic characteristics of the participants

| Variables                               | Total<br>(n=291)<br>N (%) | Non-frail<br>(n=235)<br>N (%) | Frail<br>(n=56)<br>N (%) | P value          |
|-----------------------------------------|---------------------------|-------------------------------|--------------------------|------------------|
| Age (years)                             |                           |                               |                          | 0.679            |
| 65-69                                   | 154 (52.9)                | 126 (53.6)                    | 28 (50.0)                |                  |
| 70-74                                   | 91 (31.3)                 | 74 (31.5)                     | 17 (30.4)                |                  |
| ≥75                                     | 46 (15.8)                 | 35 (14.9)                     | 11 (19.6)                |                  |
| Gender                                  |                           |                               |                          | 0.110            |
| Male                                    | 137 (47.1)                | 116 (49.4)                    | 21 (37.5)                |                  |
| Female                                  | 154 (52.9)                | 119 (50.6)                    | 35 (62.5)                |                  |
| Living place                            |                           |                               |                          | 0.336            |
| Urban                                   | 246 (84.5)                | 201 (85.5)                    | 45 (80.4)                |                  |
| Rural                                   | 45 (15.5)                 | 34 (14.5)                     | 11 (19.6)                |                  |
| Education level                         |                           |                               |                          | <b>0.010</b>     |
| Illiterate                              | 42 (14.4)                 | 26 (11.1)                     | 16 (28.6)                |                  |
| Elementary school                       | 63 (21.6)                 | 52 (22.1)                     | 11 (19.6)                |                  |
| Junior high school                      | 95 (32.6)                 | 77 (32.8)                     | 18 (32.1)                |                  |
| Senior high school                      | 55 (18.9)                 | 47 (20.0)                     | 8 (14.3)                 |                  |
| College or over                         | 36 (12.4)                 | 33 (14.0)                     | 3 (5.4)                  |                  |
| Marital status                          |                           |                               |                          | 0.421            |
| Spouse                                  | 233 (80.1)                | 186 (79.1)                    | 47 (83.9)                |                  |
| No spouse                               | 58 (19.9)                 | 49 (20.9)                     | 9 (16.1)                 |                  |
| Living status                           |                           |                               |                          | 0.456            |
| Living with others                      | 253 (86.9)                | 206 (87.7)                    | 47 (83.9)                |                  |
| Living alone                            | 38 (13.1)                 | 29 (12.3)                     | 9 (16.1)                 |                  |
| Working status                          |                           |                               |                          | <b>&lt;0.001</b> |
| Retired                                 | 215 (73.9)                | 182 (77.4)                    | 33 (58.9)                |                  |
| Currently employed                      | 23 (7.9)                  | 21 (8.9)                      | 2 (3.6)                  |                  |
| Unemployed                              | 53 (18.2)                 | 32 (13.6)                     | 21 (37.5)                |                  |
| Personal monthly income (RMB)           |                           |                               |                          | <b>0.007</b>     |
| <1000                                   | 43 (14.8)                 | 27 (11.5)                     | 16 (28.6)                |                  |
| 1000-1999                               | 50 (17.2)                 | 41 (17.4)                     | 9 (16.1)                 |                  |
| 2000-2999                               | 100 (34.4)                | 81 (34.5)                     | 19 (33.9)                |                  |
| ≥3000                                   | 98 (33.7)                 | 86 (36.6)                     | 12 (21.4)                |                  |
| Medical insurance                       |                           |                               |                          | <b>0.013</b>     |
| Urban residential insurance             | 79 (27.1)                 | 59 (25.1)                     | 20 (35.7)                |                  |
| Urban employees' insurance              | 169 (58.1)                | 146 (62.1)                    | 23 (41.1)                |                  |
| New rural cooperative medical insurance | 43 (14.8)                 | 30 (12.8)                     | 13 (23.2)                |                  |

RMB, Ren Min Bi.

**Table 2** Lifestyle and clinical characteristics of the participants

| Variables                       | Total<br>(n=291) | Non-frail<br>(n=235) | Frail<br>(n=56)  | P value      |
|---------------------------------|------------------|----------------------|------------------|--------------|
| N (%)/Median (IQR)              |                  |                      |                  |              |
| Smoking                         |                  |                      |                  | 0.344        |
| Non-smoker/ Ex-smoker           | 254 (87.3)       | 203 (86.4)           | 51 (91.1)        |              |
| Current smoker                  | 37 (12.7)        | 32 (13.6)            | 5 (8.9)          |              |
| Alcohol Drinking                |                  |                      |                  | <b>0.002</b> |
| Non-drinker/ Ex-drinker         | 213 (73.2)       | 163 (69.4)           | 50 (89.3)        |              |
| Current drinker                 | 78 (26.8)        | 72 (30.6)            | 6 (10.7)         |              |
| Sleep duration at night (hours) |                  |                      |                  | <b>0.029</b> |
| <5                              | 75 (25.8)        | 53 (22.6)            | 22 (39.3)        |              |
| 5-8                             | 192 (66.0)       | 163 (69.4)           | 29 (51.8)        |              |
| >8                              | 24 (8.2)         | 19 (8.1)             | 5 (8.9)          |              |
| Self-rated sleep quality        |                  |                      |                  | <b>0.039</b> |
| Very good                       | 33 (11.3)        | 31 (13.2)            | 2 (3.6)          |              |
| Good                            | 145 (49.8)       | 121 (51.5)           | 24 (42.9)        |              |
| Bad                             | 89 (30.6)        | 66 (28.1)            | 23 (41.1)        |              |
| Very bad                        | 24 (8.2)         | 17 (7.2)             | 7 (12.5)         |              |
| Duration of diabetes (years)    | 10 (4-16)        | 10 (5-16)            | 7 (4-13)         | 0.133        |
| Number of comorbidities         | 5 (3-6)          | 4 (3-6)              | 5 (4-7)          | <b>0.040</b> |
| Polypharmacy                    |                  |                      |                  | <b>0.036</b> |
| No                              | 205 (70.4)       | 172 (73.2)           | 33 (58.9)        |              |
| Yes                             | 86 (29.6)        | 63 (26.8)            | 23 (41.1)        |              |
| BMI (kg/m <sup>2</sup> )        |                  |                      |                  | 0.498        |
| <18.5                           | 11 (3.8)         | 8 (3.4)              | 3 (5.4)          |              |
| 18.5-23.9                       | 127 (43.6)       | 102 (43.4)           | 25 (44.6)        |              |
| 24-27.9                         | 114 (39.2)       | 96 (40.9)            | 18 (32.1)        |              |
| ≥28                             | 39 (13.4)        | 29 (12.3)            | 10 (17.9)        |              |
| Waist circumference             |                  |                      |                  | 0.213        |
| Normal                          | 51 (17.5)        | 38 (16.2)            | 13 (23.2)        |              |
| High                            | 240 (82.5)       | 197 (83.8)           | 43 (76.8)        |              |
| HbA1c (%)                       | 6.66 (5.87-7.47) | 6.55 (5.86-7.24)     | 6.97 (5.95-8.42) | <b>0.031</b> |

IQR, interquartile range; BMI, body mass index; HbA1c, glycated hemoglobin.

**Table 3** Malnutrition, depression and diabetes self-care behaviors of the participants

| Variables                      | Possible range | Actual range | Total (n=291) | Non-frail (n=235) | Frail (n=56) | P value          |
|--------------------------------|----------------|--------------|---------------|-------------------|--------------|------------------|
| N (%) / Median (IQR)           |                |              |               |                   |              |                  |
| Malnutrition risk/malnutrition |                |              |               |                   |              | <b>&lt;0.001</b> |
| No                             |                |              | 189 (64.9)    | 172 (73.2)        | 17 (30.4)    |                  |
| Yes                            |                |              | 102 (35.1)    | 63 (26.8)         | 39 (69.6)    |                  |
| Depression                     | 0-15           | 0-15         | 3 (1-5)       | 2 (1-4)           | 5 (4-8)      | <b>&lt;0.001</b> |
| Diabetes self-care behaviors   |                |              |               |                   |              |                  |
| General diet                   | 0-14           | 0-14         | 14 (10-14)    | 14 (10-14)        | 14 (10-14)   | 0.223            |
| Specific diet                  | 0-14           | 0-14         | 8 (7-12)      | 8 (7-12)          | 7 (7-12)     | 0.637            |
| Exercise                       | 0-14           | 0-14         | 7 (7-14)      | 12 (7-14)         | 7 (0-7)      | <b>&lt;0.001</b> |
| Blood-glucose testing          | 0-14           | 0-14         | 0 (0-2)       | 0 (0-2)           | 0 (0-1)      | 0.066            |
| Foot care                      | 0-14           | 0-14         | 0 (0-7)       | 0 (0-7)           | 0 (0-0)      | <b>0.004</b>     |
| Medication care                | 0-7            | 0-7          | 7 (7-7)       | 7 (7-7)           | 7 (7-7)      | <b>0.026</b>     |

IQR, interquartile range.

**Table 4** Logistic regression model of predictors for frailty

|                                | <b>B</b> | <b>SE</b> | <b>Wald X<sup>2</sup></b> | <b>P value</b> | <b>OR</b> | <b>95% CI</b>   |
|--------------------------------|----------|-----------|---------------------------|----------------|-----------|-----------------|
| Alcohol Drinking               |          |           |                           |                |           |                 |
| Non-drinker/Ex-drinker         | 1.476    | 0.530     | 7.746                     | 0.005          | 4.374     | 1.547 to 12.366 |
| Current drinker                | -        | -         | -                         | -              | 1         | -               |
| HbA1c                          | 0.318    | 0.111     | 8.167                     | 0.004          | 1.374     | 1.105 to 1.709  |
| Malnutrition risk/Malnutrition |          |           |                           |                |           |                 |
| No                             | -        | -         | -                         | -              | 1         | -               |
| Yes                            | 1.284    | 0.431     | 8.888                     | 0.003          | 3.612     | 1.553 to 8.402  |
| Depression                     | 0.132    | 0.063     | 4.358                     | 0.037          | 1.141     | 1.008 to 1.291  |
| Exercise                       | -0.121   | 0.037     | 10.547                    | 0.001          | 0.886     | 0.823 to 0.953  |
| Foot care                      | -0.115   | 0.046     | 6.358                     | 0.012          | 0.891     | 0.815 to 0.975  |
| Constant                       | -4.840   | 1.073     | 20.368                    | <0.001         | 0.008     |                 |

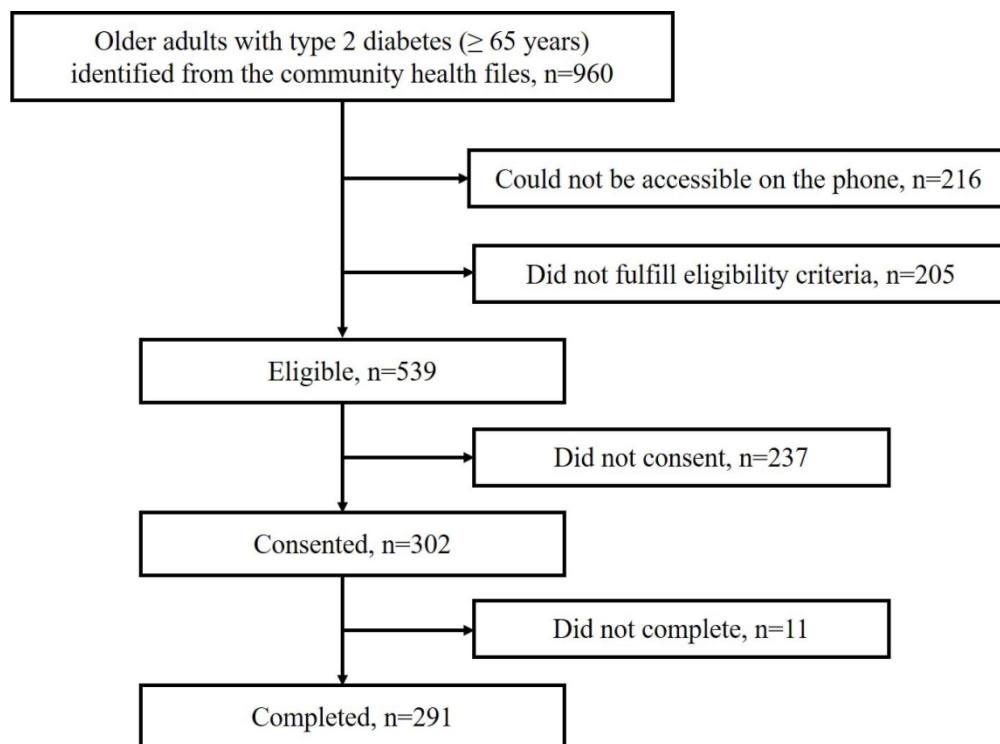

Flow chart of inclusion of participants

234x173mm (300 x 300 DPI)



**STROBE 2007 (v4) Statement—Checklist of items that should be included in reports of *cross-sectional studies***

| Section/Topic                | Item # | Recommendation                                                                                                                                                                       | Reported on page # |
|------------------------------|--------|--------------------------------------------------------------------------------------------------------------------------------------------------------------------------------------|--------------------|
| <b>Title and abstract</b>    | 1      | (a) Indicate the study's design with a commonly used term in the title or the abstract                                                                                               | 1-2                |
|                              |        | (b) Provide in the abstract an informative and balanced summary of what was done and what was found                                                                                  | 2                  |
| <b>Introduction</b>          |        |                                                                                                                                                                                      |                    |
| Background/rationale         | 2      | Explain the scientific background and rationale for the investigation being reported                                                                                                 | 4-6                |
| Objectives                   | 3      | State specific objectives, including any prespecified hypotheses                                                                                                                     | 6                  |
| <b>Methods</b>               |        |                                                                                                                                                                                      |                    |
| Study design                 | 4      | Present key elements of study design early in the paper                                                                                                                              | 6                  |
| Setting                      | 5      | Describe the setting, locations, and relevant dates, including periods of recruitment, exposure, follow-up, and data collection                                                      | 6, 9-10            |
| Participants                 | 6      | (a) Give the eligibility criteria, and the sources and methods of selection of participants                                                                                          | 6-7, 9-10          |
| Variables                    | 7      | Clearly define all outcomes, exposures, predictors, potential confounders, and effect modifiers. Give diagnostic criteria, if applicable                                             | 10                 |
| Data sources/<br>measurement | 8*     | For each variable of interest, give sources of data and details of methods of assessment (measurement). Describe comparability of assessment methods if there is more than one group | 7-9                |
| Bias                         | 9      | Describe any efforts to address potential sources of bias                                                                                                                            | 9                  |
| Study size                   | 10     | Explain how the study size was arrived at                                                                                                                                            | 7                  |
| Quantitative variables       | 11     | Explain how quantitative variables were handled in the analyses. If applicable, describe which groupings were chosen and why                                                         | 10                 |
| Statistical methods          | 12     | (a) Describe all statistical methods, including those used to control for confounding                                                                                                | 10                 |
|                              |        | (b) Describe any methods used to examine subgroups and interactions                                                                                                                  |                    |
|                              |        | (c) Explain how missing data were addressed                                                                                                                                          |                    |
|                              |        | (d) If applicable, describe analytical methods taking account of sampling strategy                                                                                                   |                    |
|                              |        | (e) Describe any sensitivity analyses                                                                                                                                                |                    |
| <b>Results</b>               |        |                                                                                                                                                                                      |                    |

|                          |     |                                                                                                                                                                                                              |       |
|--------------------------|-----|--------------------------------------------------------------------------------------------------------------------------------------------------------------------------------------------------------------|-------|
| Participants             | 13* | (a) Report numbers of individuals at each stage of study—eg numbers potentially eligible, examined for eligibility, confirmed eligible, included in the study, completing follow-up, and analysed            | 11    |
|                          |     | (b) Give reasons for non-participation at each stage                                                                                                                                                         | 11    |
|                          |     | (c) Consider use of a flow diagram                                                                                                                                                                           | 11    |
| Descriptive data         | 14* | (a) Give characteristics of study participants (eg demographic, clinical, social) and information on exposures and potential confounders                                                                     | 11-12 |
|                          |     | (b) Indicate number of participants with missing data for each variable of interest                                                                                                                          |       |
| Outcome data             | 15* | Report numbers of outcome events or summary measures                                                                                                                                                         | 11    |
| Main results             | 16  | (a) Give unadjusted estimates and, if applicable, confounder-adjusted estimates and their precision (eg, 95% confidence interval). Make clear which confounders were adjusted for and why they were included | 12    |
|                          |     | (b) Report category boundaries when continuous variables were categorized                                                                                                                                    | 25-26 |
|                          |     | (c) If relevant, consider translating estimates of relative risk into absolute risk for a meaningful time period                                                                                             |       |
| Other analyses           | 17  | Report other analyses done—eg analyses of subgroups and interactions, and sensitivity analyses                                                                                                               |       |
| <b>Discussion</b>        |     |                                                                                                                                                                                                              |       |
| Key results              | 18  | Summarise key results with reference to study objectives                                                                                                                                                     | 13    |
| Limitations              | 19  | Discuss limitations of the study, taking into account sources of potential bias or imprecision. Discuss both direction and magnitude of any potential bias                                                   | 16    |
| Interpretation           | 20  | Give a cautious overall interpretation of results considering objectives, limitations, multiplicity of analyses, results from similar studies, and other relevant evidence                                   | 13-16 |
| Generalisability         | 21  | Discuss the generalisability (external validity) of the study results                                                                                                                                        | 16    |
| <b>Other information</b> |     |                                                                                                                                                                                                              |       |
| Funding                  | 22  | Give the source of funding and the role of the funders for the present study and, if applicable, for the original study on which the present article is based                                                | 18    |

\*Give information separately for cases and controls in case-control studies and, if applicable, for exposed and unexposed groups in cohort and cross-sectional studies.

**Note:** An Explanation and Elaboration article discusses each checklist item and gives methodological background and published examples of transparent reporting. The STROBE checklist is best used in conjunction with this article (freely available on the Web sites of PLoS Medicine at <http://www.plosmedicine.org/>, Annals of Internal Medicine at <http://www.annals.org/>, and Epidemiology at <http://www.epidem.com/>). Information on the STROBE Initiative is available at [www.strobe-statement.org](http://www.strobe-statement.org).

# BMJ Open

## Predictors of frailty among Chinese community-dwelling older adults with type 2 diabetes: A cross-sectional survey

|                                 |                                                                                                                                                                                                                                                                                                                                                                                                                                                                                                                                                                                                                                                                                                                                                   |
|---------------------------------|---------------------------------------------------------------------------------------------------------------------------------------------------------------------------------------------------------------------------------------------------------------------------------------------------------------------------------------------------------------------------------------------------------------------------------------------------------------------------------------------------------------------------------------------------------------------------------------------------------------------------------------------------------------------------------------------------------------------------------------------------|
| Journal:                        | <i>BMJ Open</i>                                                                                                                                                                                                                                                                                                                                                                                                                                                                                                                                                                                                                                                                                                                                   |
| Manuscript ID                   | bmjopen-2020-041578.R1                                                                                                                                                                                                                                                                                                                                                                                                                                                                                                                                                                                                                                                                                                                            |
| Article Type:                   | Original research                                                                                                                                                                                                                                                                                                                                                                                                                                                                                                                                                                                                                                                                                                                                 |
| Date Submitted by the Author:   | 28-Oct-2020                                                                                                                                                                                                                                                                                                                                                                                                                                                                                                                                                                                                                                                                                                                                       |
| Complete List of Authors:       | Kong, Linglin; Huazhong University of Science and Technology, Tongji Medical College, School of Nursing ; Hubei University Of Science and Technology, School of Nursing<br>Zhao, Huimin; Huazhong University of Science and Technology, Tongji Medical College, School of Nursing<br>Fan, Junyao; Huazhong University of Science and Technology, Tongji Medical College, School of Nursing<br>Wang, Quan; Huazhong University of Science and Technology, Tongji Medical College, School of Nursing<br>Li, Jie; Huazhong University of Science and Technology, Tongji Medical College, School of Nursing<br>Bai, Jinbing; Emory University,<br>Mao, Jing; Huazhong University of Science and Technology, Tongji Medical College, School of Nursing |
| <b>Primary Subject Heading</b>: | Geriatric medicine                                                                                                                                                                                                                                                                                                                                                                                                                                                                                                                                                                                                                                                                                                                                |
| Secondary Subject Heading:      | Diabetes and endocrinology, Geriatric medicine                                                                                                                                                                                                                                                                                                                                                                                                                                                                                                                                                                                                                                                                                                    |
| Keywords:                       | GERIATRIC MEDICINE, PRIMARY CARE, General diabetes < DIABETES & ENDOCRINOLOGY                                                                                                                                                                                                                                                                                                                                                                                                                                                                                                                                                                                                                                                                     |
|                                 |                                                                                                                                                                                                                                                                                                                                                                                                                                                                                                                                                                                                                                                                                                                                                   |

SCHOLARONE™  
Manuscripts



I, the Submitting Author has the right to grant and does grant on behalf of all authors of the Work (as defined in the below author licence), an exclusive licence and/or a non-exclusive licence for contributions from authors who are: i) UK Crown employees; ii) where BMJ has agreed a CC-BY licence shall apply, and/or iii) in accordance with the terms applicable for US Federal Government officers or employees acting as part of their official duties; on a worldwide, perpetual, irrevocable, royalty-free basis to BMJ Publishing Group Ltd ("BMJ") its licensees and where the relevant Journal is co-owned by BMJ to the co-owners of the Journal, to publish the Work in this journal and any other BMJ products and to exploit all rights, as set out in our [licence](#).

The Submitting Author accepts and understands that any supply made under these terms is made by BMJ to the Submitting Author unless you are acting as an employee on behalf of your employer or a postgraduate student of an affiliated institution which is paying any applicable article publishing charge ("APC") for Open Access articles. Where the Submitting Author wishes to make the Work available on an Open Access basis (and intends to pay the relevant APC), the terms of reuse of such Open Access shall be governed by a Creative Commons licence – details of these licences and which [Creative Commons](#) licence will apply to this Work are set out in our licence referred to above.

Other than as permitted in any relevant BMJ Author's Self Archiving Policies, I confirm this Work has not been accepted for publication elsewhere, is not being considered for publication elsewhere and does not duplicate material already published. I confirm all authors consent to publication of this Work and authorise the granting of this licence.

---

1 **Predictors of frailty among Chinese community-dwelling older adults with type 2**  
2 **diabetes: A cross-sectional survey**

3 Linglin Kong,<sup>1,2</sup> Huimin Zhao,<sup>1</sup> Junyao Fan,<sup>1</sup> Quan Wang,<sup>1</sup> Jie Li,<sup>1</sup> Jinbing Bai,<sup>3</sup> Jing Mao<sup>1</sup>

4 <sup>1</sup>School of Nursing, Tongji Medical College, Huazhong University of Science and  
5 Technology, Wuhan, Hubei, China

6 <sup>2</sup>School of Nursing, Hubei University of Science and Technology, Xianning, Hubei, China

7 <sup>3</sup>Nell Hodgson Woodruff School of Nursing, Emory University, Atlanta, Georgia, USA

8  
9 **Corresponding authors:**

10 Jie Li, MSN, PhD, RN

11 Associate Professor

12 E-mail: lijie@hust.edu.cn

13 Tel.: + 86 18971097091

14  
15 Jing Mao, MD, PhD

16 Professor

17 E-mail: maojing@hust.edu.cn

18 Tel.: + 86 13317135988

19  
20 **Word count: 3705**

21

22

---

## 1 ABSTRACT

2 **Objectives:** To assess the prevalence of frailty and identify predictors of frailty among  
3 Chinese community-dwelling older adults with type 2 diabetes.

4 **Design:** A cross-sectional design.

5 **Setting:** Two community health centers in central China.

6 **Participants:** 291 community-dwelling older adults aged  $\geq 65$  years with type 2 diabetes.

7 **Main outcome measures:** Data were collected via face-to-face interviews, anthropometric  
8 measurements, laboratory tests, and community health files. The main outcome measure was  
9 frailty, as assessed by the frailty phenotype criteria. The multivariate logistic regression  
10 model was used to identify the predictors of frailty.

11 **Results:** The prevalence of pre-frailty and frailty were 51.5% and 19.2%, respectively. The  
12 significant predictors of frailty included alcohol drinking (ex-drinker) (OR = 4.461, 95% CI  
13 1.079 to 18.438), glycated hemoglobin (HbA1c) (OR = 1.434, 95% CI 1.045 to 1.968),  
14 nutritional status (malnutrition risk/malnutrition) (OR = 8.062, 95% CI 2.470 to 26.317),  
15 depression (OR = 1.438, 95% CI 1.166 to 1.773), and exercise behavior (OR = 0.796, 95% CI  
16 0.716 to 0.884).

17 **Conclusions:** A high prevalence of frailty was found among older adults with type 2 diabetes  
18 in the Chinese community. Frailty identification and multi-faceted interventions should be  
19 developed for this population, taking into consideration proper glycemic control, nutritional  
20 instruction, depressive symptoms improvement, and enhancement of self-care behaviors.

---

## 1 ARTICLE SUMMARY

### 2 Strengths and limitations of this study

- 3 • The study evaluated an extensive list of sociodemographic factors, lifestyle and clinical  
4 characteristics, nutritional status, depression, and diabetes self-care behaviors that could  
5 influence the frailty status of community-dwelling older adults with type 2 diabetes.
- 6 • The study examined which domains of diabetes self-care behaviors were associated with  
7 frailty among diabetic older adults.
- 8 • The study is a cross-sectional study, so a causal relationship between factors associated  
9 with frailty could not be established.
- 10 • The study was conducted in one city of China, which may affect the generalizability of the  
11 findings.

### 14 KEYWORDS

15 Community-dwelling older adults; frailty; predictors; type 2 diabetes.

---

## 1 INTRODUCTION

2 Across the world, the estimated number of people aged 65–99 years with diabetes was 136  
3 million (19.3%) in 2019, and this number is estimated to increase to 195 million in 2030 and  
4 276 million in 2045.<sup>1</sup> China had the world's largest number of adults with diabetes,<sup>1</sup> and the  
5 prevalence of older Chinese adults with diabetes over the age of 60 was 20.2% in the latest  
6 national survey.<sup>2</sup> Elderly people with type 2 diabetes are at risk for developing frailty,<sup>3</sup> a  
7 geriatric syndrome manifesting as a reduction in one's physical strength, endurance, and  
8 physiologic function that increases the likelihood of developing functional dependency and  
9 death.<sup>4</sup> Diabetic people are more likely to be frail than their non-diabetic counterparts.<sup>5 6</sup> This  
10 relationship between diabetes and frailty may be explained by the fact that diabetes impairs  
11 skeletal muscle function, vascular function, and hormonal milieu, as well as accelerates  
12 sarcopenia, thereby leading to increased frailty.<sup>3 7 8</sup>

13 Frailty is associated with higher disability, mortality, cardiovascular events, and  
14 healthcare utilization among older adults with type 2 diabetes.<sup>9 10</sup> Identifying the associated  
15 factors for frailty among older adults with diabetes may help to improve their health  
16 outcomes. A few studies have shown that sociodemographic factors (e.g., age, education  
17 level),<sup>6 11</sup> physical factors (e.g., systolic blood pressure, bodyweight, abdominal obesity),<sup>6 11</sup>  
18 <sup>12</sup> and biological factors (e.g., glycated hemoglobin [HbA1c], albumin, high-density  
19 lipoprotein cholesterol)<sup>6 11</sup> were associated with frailty in diabetic older adults. Until now,  
20 important, modifiable factors such as nutritional status, psychological well-being, and self-  
21 care behavioral factors were rarely studied among community-dwelling diabetic older adults.



1 The association between malnutrition and frailty has been established among  
2 community-dwelling older adults.<sup>13 14</sup> Depression is another common factor associated with  
3 frailty among the elderly.<sup>15 16</sup> However, there is a lack of understanding of the impact of  
4 malnutrition and depression on frailty among the specific diabetic older population. Diabetic  
5 older adults should adopt numerous diabetes self-care behaviors to control their disease; these  
6 behaviors include proper diet, regular exercise, self-monitoring of blood glucose, proper foot  
7 care, and strict adherence to prescribed medications.<sup>17</sup> Nevertheless, there is a dearth of  
8 studies on which domains of diabetes self-care behaviors are preferentially associated with  
9 frailty. Examining these associations is important for developing specific interventions to  
10 reduce the risk of frailty for diabetic older people.

11 In China, there is an increasing number of older people with type 2 diabetes living in  
12 the community, and the health management of the diabetic elderly population is the focus of  
13 many community health services; however, frailty is not among the physical conditions that  
14 is routinely screened for in this population.<sup>18</sup> Little is known about the frailty status among  
15 the community-dwelling older adults with type 2 diabetes in China. To our knowledge, only  
16 one study reported the prevalence of frailty in a community-dwelling diabetic population in  
17 mainland China; however, that study included a sample of diabetic people aged 55 years and  
18 older, identifying the risk factors of frailty among an elevated blood glucose (pre-diabetes  
19 and diabetes) population.<sup>5</sup> Therefore, the aims of this study were to assess the prevalence of  
20 frailty and explore the predictors of frailty among Chinese community-dwelling older adults  
21 with type 2 diabetes.

## 22 **METHODS**

---

## 1 **Study design and setting**

2 A cross-sectional design was used. The participants were recruited from two community  
3 health centers of Xianning City of Hubei Province in China from June to October 2019. Both  
4 community health centers provided primary health care services for older people in urban and  
5 rural communities.

## 6 **Data collection and ethical considerations**

7 Ethical Approval was obtained from the Medical Ethics Committee of Huazhong University  
8 and Science and Technology (No. 2019–S941) prior to data collection. The researcher  
9 contacted the directors of two community health centers and explained the aims of this study.  
10 After permission was granted, the public health nurses and physicians were invited to assist  
11 with data collection. Health center staff helped to recruit participants by phone, informing the  
12 eligible diabetic older adults of the study purpose. Eligible individuals were then invited to  
13 the community health centers to complete the survey if they consented to participate. As  
14 another means of recruitment, when older adults with type 2 diabetes went to the community  
15 health centers for a physical check-up, follow-up blood glucose monitoring, or health  
16 education, they were also invited to participate in this study, if eligible. Once the written  
17 informed consent was obtained from each participant, the survey was administered by trained  
18 investigators. The information in this survey was obtained from the participants' self-  
19 reporting, anthropometric measurements, and laboratory test results, which were  
20 supplemented by the community health files.

## 21 **Participants**

1 Older adults with type 2 diabetes were identified from the electronic files of the two  
2 community health centers. The inclusion criteria of this study were as follows: (1) at least 65  
3 years old and living in the community; (2) diagnosed with type 2 diabetes, as confirmed by a  
4 physician based on the World Health Organization diagnostic criteria, 1999; (3) received  
5 their diagnosis at least 6 months prior to joining the study. The diabetic older adults were  
6 excluded if they: (1) could not walk independently; (2) had severe vision and hearing  
7 problems; (3) were unable to communicate with the investigators; (4) had dementia or mental  
8 health disorders; and (5) had acute diabetic complications.

9 The sample size was calculated using the formula for cross-sectional studies,<sup>19</sup>  $n =$   
10  $\frac{Z^2 P(1 - P)}{d^2}$ . Where n is the sample size, Z is the statistic corresponding to level of confidence,  
11 P is expected prevalence, and d is precision. We assumed a confidence level of 95.0%,  
12 expected frailty prevalence of 20.0% for community-dwelling older adults with type 2  
13 diabetes (determined by the pre-survey), and precision of 5.0%, indicating that at least 246  
14 participants were needed for this study.

### 15 **Survey instrument**

16 The personal information questionnaire was used to collect the participants' characteristics.  
17 The sociodemographic characteristics included age, gender, living place, education level,  
18 marital status, living status, working status, personal monthly income, and medical insurance;  
19 the lifestyle and clinical characteristics included smoking, alcohol drinking, sleep duration at  
20 night, self-rated quality of sleep, duration of diabetes, number of comorbidities,  
21 polypharmacy, body mass index (BMI), waist circumference, and HbA1c. Smoking status  
22 was categorized as current smoker (having smoked at least one cigarette per day), ex-smoker

(having stopped smoking at least one year before the survey) and non-smoker (having never smoked in one's lifetime). Alcohol drinking status was categorized into current drinker (someone who reported consuming alcohol currently), ex-drinker (someone who had quit drinking at least one year prior to the survey), and non-drinker (someone who reported never consuming alcohol). Polypharmacy was defined as concurrent use of 5 or more drugs. BMI was calculated by weight (kg)/ [height (m)]<sup>2</sup> and classified as underweight, normal, overweight, and obese (< 18.5, 18.5-23.9, 24.0-27.9, and ≥ 28.0 kg/m<sup>2</sup>), and high waist circumference was defined as ≥ 85 cm in men and ≥ 80 cm in women.<sup>20</sup>

Frailty was measured using the modified frailty phenotype criteria, which was based on the phenotypic criteria proposed by Fried *et al.*<sup>21</sup> The criteria included five components: (1) Unintentional weight loss: weight loss ≥ 4.5kg in the past year, not due to dieting and exercise; (2) Exhaustion: It was identified based on a response of “3-4 days or most of the time” during the week to either of the two questions: “I felt that everything I did was an effort” and “I could not get going”; (3) Slowness: average walking speed was tested by asking the participants to walk 6 meters at their usual pace, at total of two times. Slowness was identified by walking speed for men (≤ 0.89m/s) and women (≤ 0.79m/s)<sup>22</sup>; (4) Weakness: grip strength was measured with a dynamometer three times on each hand, and the maximum of the readings was used. Weakness was judged by grip strength for men (≤ 28kg) and women (≤ 18kg)<sup>22</sup>; and (5) Low physical activity: the Chinese version of Physical Activity Scale for the Elderly (PASE)<sup>23</sup> was used to assess participants' physical activity level in the past week. Low physical activity was classified by PASE score for men (≤ 56.4) and women (≤ 58.8).<sup>22</sup> One point was assigned for the presence of each component, and the

1 summed score was used to classify participants as robust (score = 0), pre-frail (score = 1-2)  
2 and frail (score = 3-5).

3 Mini-Nutritional Assessment (MNA) was used to assess the nutritional status of older  
4 adults.<sup>24</sup> It consists of 18 items grouped into four parts: anthropometric assessment, general  
5 assessment, dietary assessment, and self-assessment. The total score ranges from 0 to 30 and  
6 is used to classify the elderly as well-nourished ( $\geq 24$ ), at risk of malnutrition (17–23.5), or  
7 malnourished ( $< 17$ ). The Chinese version of MNA has been proven to be reliable and valid  
8 in the community-dwelling older population.<sup>25</sup>

9 Geriatric Depression Scale-15 (GDS-15) was used to evaluate the depressive  
10 symptoms of older adults.<sup>26</sup> The scale contains 15 items that require the subjects to answer  
11 with “yes” or “no”. The maximum score of the scale is 15, and a higher score indicates more  
12 severe depressive symptoms. The Chinese version of GDS-15 is a reliable and valid  
13 screening tool for assessing geriatric depression in the Chinese population.<sup>27</sup>

14 The Chinese version of Summary of Diabetes Self-Care Activities (SDSCA)<sup>28</sup> was  
15 used to measure self-care behaviors of the older adults with type 2 diabetes; this instrument  
16 was modified from the original SDSCA.<sup>17</sup> It is a brief self-report questionnaire that includes  
17 11 items assessing the following aspects: general diet, specific diet, exercise, blood-glucose  
18 testing, foot care, and medication care in the past week. The total score of this scale ranges  
19 from 0 to 77, and a higher score indicates better diabetes self-care behaviors. It showed good  
20 validity and test-retest reliability in Chinese patients with type 2 diabetes.<sup>28</sup>

21 Anthropometric measurements, including height or knee height, weight, mid-arm  
22 circumference, calf circumference, and waist circumference, were measured by the trained

1 investigators according to the measurement manual. Knee height was measured and  
2 converted to the estimated height using specific equations<sup>29</sup> for the older adults with severe  
3 spinal curvature. All the HbA1c measures were obtained after the participants were recruited  
4 into the study. The blood collection and HbA1c measurements were administered by the  
5 community health center laboratories when the participants came to the centers for this  
6 survey.

### 7 **Data analysis**

8 The SPSS version 21.0 (SPSS Inc., Chicago, IL, USA) was used for data analysis. Frailty was  
9 defined as the dependent variable with 1= robust (0 on the frailty phenotype criteria), 2 = pre-  
10 frail (1-2), 3 = frail ( $\geq 3$ ). Sociodemographic, lifestyle and clinical characteristics,  
11 malnutrition, depression, and diabetes self-care behaviors were considered potential factors  
12 for frailty. Raw data were evaluated for normality and multi-collinearity before data analysis.  
13 Data were described as n (%) for categorical variables and median (interquartile range [IQR])  
14 or mean  $\pm$  SD for continuous variables. To test the statistical difference among groups,  
15 univariate analyses were conducted using chi-square test for categorical variables and  
16 Kruskal-Wallis H test for continuous variables. Variables that showed statistical significance  
17 of  $P < 0.1$  in the univariate analyses were included in the multinomial logistic regression,  
18 which estimated the prevalence odds ratio (OR) for pre-frail relative to robust and for frail  
19 relative to robust. The statistical significance was set at  $P < 0.05$  for the logistic regression.

### 20 **Patient and public involvement**

1 Patients were not involved in the development of research question or the design of the study.  
2 Anthropometric measurements and HbA1c test results were provided to the participants,  
3 community physicians and nurses.

## 4 **RESULTS**

5 As shown in figure 1, a total of 302 eligible older adults consented to participate in this study.  
6 Eleven participants did not complete the questionnaires due to temporary issues and limited  
7 time, so the final sample consisted of 291 participants. Among these participants, 85 (29.2%)  
8 were robust, 150 (51.5%) were pre-frail, and 56 (19.2%) were frail.

### 9 **Characteristics of the participants**

10 The median age of participants was 69 years (IQR 67-72), with a range from 65 to 85 years.  
11 Among the participants, 154 (52.9%) were female. The majority of the participants were  
12 living in urban areas (84.5%), had junior high school or higher education (63.9%), had a  
13 spouse (80.1%), lived with others (86.9%), were currently not working (92.1%), had a  
14 personal monthly income below 3000 yuan (66.3%), and had urban employees' insurance  
15 (58.1%) (table 1).

16 Regarding the lifestyle characteristics, most of the participants were non-smokers  
17 (63.6%), non-drinkers (57.4%), with 5-8 h sleep duration at night per day (66.0%), and had  
18 good/very good sleep quality (61.2%) (table 2). Considering clinical characteristics, the  
19 median duration of diabetes was 10 years (IQR 4-16), and the median number of  
20 comorbidities was 5 (IQR 3-6). Among all participants, 29.6% had polypharmacy, 43.6% had  
21 normal BMI, and 17.5% had a normal waist circumference. The median score of HbA1c was  
22 6.66% (IQR 5.87-7.47) (table 2).

---

## 1 **Malnutrition, depression, and diabetes self-care behaviors**

2 Of all participants, 96 (33.0%) were at risk of malnutrition, 6 (2.1%) were malnourished, and  
3 189 (64.9%) were nourished. The median score of depression was 3 (IQR 1-5). The total  
4 score for diabetes self-care behaviors ranged from 12 to 70, with an average of  $40.25 \pm 10.08$ .  
5 Among the 6 sub-dimensions of diabetes self-care behaviors, the two dimensions with the  
6 lowest level were blood-glucose testing (0 [0-2]) and foot care (0 [0-7]) (table 3).

## 7 **Univariate analyses for influencing factors of frailty**

8 Univariate analyses were conducted to explore the associated factors for frailty according to  
9 the criterion of inclusion ( $p < 0.10$ ). Significant sociodemographic differences among groups  
10 were found for education level ( $p = 0.077$ ), personal monthly income ( $p = 0.026$ ), and  
11 medical insurance ( $p = 0.034$ ) (table 1). Regarding the lifestyle and clinical characteristics,  
12 significant group differences included alcohol drinking ( $p = 0.004$ ), sleep duration at night ( $p$   
13  $= 0.046$ ), self-rated sleep quality ( $p = 0.065$ ), duration of diabetes ( $p = 0.036$ ), comorbidities  
14 ( $p = 0.030$ ), polypharmacy ( $p = 0.025$ ), and HbA1c ( $p = 0.055$ ) (table 2). As shown in table 3,  
15 significant group differences were noted for malnutrition risk/malnutrition ( $p < 0.001$ ),  
16 depression ( $p < 0.001$ ), exercise ( $p < 0.001$ ), foot care ( $p = 0.007$ ), and medication care ( $p =$   
17  $0.060$ ).

## 18 **Predictors of frailty**

19 The predictors of pre-frailty for older adults with type 2 diabetes in this study included  
20 alcohol drinking (ex-drinker) ( $p = 0.017$ ), malnutrition risk/malnutrition ( $p = 0.026$ ),  
21 depression ( $p = 0.003$ ), and exercise ( $p = 0.008$ ) (table 4). The following predictors were  
22 found for the condition of frailty: alcohol drinking (ex-drinker) ( $p = 0.039$ ), HbA1c ( $p =$



1 0.026), malnutrition risk/malnutrition ( $p = 0.001$ ), depression ( $p = 0.001$ ), and exercise ( $p <$   
2 0.001) (table 4).

### 3 **DISCUSSION**

4 In this study, we assessed frailty status and its associated factors among Chinese community-  
5 dwelling older adults with type 2 diabetes. We found the prevalence of pre-frailty and frailty  
6 were 51.5% and 19.2%, respectively. Our result was comparable with the Beijing study (the  
7 prevalence of frailty was 19.32%),<sup>5</sup> however, the Beijing study applied the accumulation of  
8 deficits method (Frailty Index  $\geq 0.25$ ) to measure frailty among diabetic people aged  $\geq 55$   
9 years. By using the Fried frailty phenotype for assessing frailty, the prevalence of frailty in  
10 people with diabetes aged 65 and older was 25.0%-32.0%, as reported in the American  
11 studies.<sup>21 30</sup> In addition, studies conducted in Singapore and Spain showed lower frailty  
12 prevalence of 8.2% and 11.2%, respectively,<sup>6 10</sup> but, these two studies also recruited younger  
13 diabetic adults (i.e. younger than 65 years). The explanation for the wide variation in the  
14 prevalence of frailty in community-dwelling diabetic elderly populations is probably related  
15 to frailty instrument differences, sample difference, and socioeconomic differences among  
16 the studies.

17 Alcohol drinking was one predictor of frailty and pre-frailty among the diabetic older  
18 adults, and the frailty risk was significantly higher among ex-drinkers compared with non-  
19 drinkers. This association could be explained by the “sick quitter” effect. The diabetic older  
20 adults in poor health may reduce alcohol consumption or quit drinking, so the ex-drinker  
21 group may contain people with previous alcoholism or with a poor health condition.<sup>31</sup> In our  
22 study, it is interesting that current drinking status showed a protective effect (OR = 0.266,  $p =$

1  
2  
3  
4 1 0.055) on frailty compared with non-drinkers, although this factor didn't satisfy the statistical  
5  
6  
7 2 significance in the logistic regression. Previous studies indicated alcohol use (especially  
8  
9 3 moderate drinking) had a negative association with physical frailty.<sup>32-34</sup> Moreover, a recent  
10  
11  
12 4 study demonstrated moderate alcohol consumption may protect against frailty through an  
13  
14 5 anti-inflammatory mechanism, which indicated that C-reactive protein level partially  
15  
16  
17 6 mediated the relationship between moderate alcohol use and physical frailty.<sup>35</sup>

18  
19  
20 7 Elevated HbA1c was associated with an increased risk of frailty among community-  
21  
22 8 dwelling diabetic older adults, which was consistent with the previous study in diabetic older  
23  
24  
25 9 people.<sup>6</sup> Hyperglycemia could contribute to physical frailty through several potential  
26  
27  
28 10 mechanisms, such as increasing microvascular damage<sup>36</sup> or causing skeletal muscle  
29  
30  
31 11 mitochondrial dysfunction.<sup>37</sup> In contrast, Yanagita *et al*<sup>11</sup> reported low level of HbA1c was  
32  
33 12 associated with frailty measured by the Clinical Frailty Scale (CFS) among diabetic older  
34  
35  
36 13 adults. Zaslavsky *et al*<sup>38</sup> found a U-shaped relationship between glucose levels and physical  
37  
38 14 frailty in older adults with diabetes, with the lowest risk of frailty at HbA1c levels of 7.6%.  
39  
40  
41 15 Overall, poor glucose control with hyperglycemia or hypoglycemia may increase the risk of  
42  
43  
44 16 frailty. Therefore, optimal glycemic control needs to be individually determined for older  
45  
46  
47 17 adults with type 2 diabetes.<sup>39</sup> The global guideline for managing type 2 diabetes in older  
48  
49 18 adults recommended that a HbA1c target up to 8.5% may be appropriate for frail diabetic  
50  
51  
52 19 elderly persons with functional dependency.<sup>40</sup> Recently, an international position statement  
53  
54  
55 20 on the management of frailty in diabetes mellitus patients recommended a HbA1c target  
56  
57  
58 21 range of 7.0%-8.0% for mild to moderate frail diabetic older adults, and 7.5%-8.5% for those  
59  
60 22 with severe frailty.<sup>41</sup>

1 Malnutrition led to pre-frailty and frailty among community-dwelling older adults  
2 with type 2 diabetes, which was comparable with the findings of a Spanish study.<sup>12</sup> In the  
3 current study, 35.1% of our participants were at risk for malnutrition or were malnourished,  
4 and 52.6% of them were overweight or obese. However, 39 (38.2%) of the participants who  
5 had malnutrition risk or were malnourished in this study were classified as either overweight  
6 or obese. This result suggests that the diabetic elderly can suffer from malnutrition status  
7 even if they are overweight or obese. Malnutrition is prevalent in diabetic older adults<sup>42 43</sup> due  
8 to various reasons, such as ageing-related appetite reductions, swallowing difficulties, limited  
9 mobility, and overly dietary restrictions.<sup>44</sup> We found that 45.4% of the diabetic older adults  
10 scored 0 points on the item of protein intake in this study, indicating that those people might  
11 have insufficient protein intake. Although malnutrition and physical frailty share some  
12 common screening items and physiology, they are not interchangeable syndromes, and  
13 community-dwelling diabetic older people with malnutrition were more prone to be  
14 physically frail. Screening the nutritional status of diabetic older adults and providing them  
15 with appropriate dietary instructions would be an effective method for preventing physical  
16 frailty within this population.

17 Consistent with previous studies among older populations,<sup>15 16</sup> this study highlighted  
18 the significant impact of depression on pre-frailty and frailty among the diabetic elderly.  
19 Recent evidence showed a reciprocal interaction between depression and frailty in older  
20 adults.<sup>16</sup> Depression contributes to physical frailty due to the decrease in physical activities or  
21 weight loss, and in turn, physical frailty may cause functional dependence or disability, thus  
22 leading to depression. Diabetes can contribute to depression, which is a common condition in

1 people with type 2 diabetes, especially in the elderly.<sup>45 46</sup> Therefore, there is an urgent need  
2 for appropriate management of depressive symptoms in elderly diabetic adults in order to  
3 help slow the progression of physical frailty in this population.

4 We found exercise behavior was a protective factor for frailty among community-  
5 dwelling diabetic older adults. A higher score of exercise behavior was associated with a  
6 lower risk of pre-frailty and frailty. Exercise can help reduce frailty through mechanisms of  
7 decreasing muscle inflammation, promoting anabolism, and increasing muscle protein  
8 synthesis.<sup>47</sup> Education programs for exercise training have shown to be effective at improving  
9 frailty in the elderly.<sup>48</sup> Pariser *et al*<sup>49</sup> conducted a diabetes self-management education  
10 program comprised of ten weeks of aerobic and resistance exercise training, which  
11 effectively reduced HbA1c and frailty in diabetic older adults. In addition, the three different  
12 frailty groups (i.e. robust, pre-frail, and frail) differed significantly in terms of medication  
13 care and foot self-care behaviors in this study. The association between medication care  
14 behavior and frailty may be explained by the fact that adherence to medication is directly  
15 associated with the control of blood glucose, which has an impact on the progression of  
16 frailty. The association between foot self-care behavior and frailty could be explained by the  
17 observation that the participants with a higher score on foot care were more likely to be active  
18 in self-management for complications prevention and concerned about their own health,  
19 contributing to a reduced risk of frailty.

20 This study has several limitations. First, this study is a cross-sectional study, therefore  
21 the causal relationship of the associated factors with frailty could not be established. Second,  
22 information such as the older adults' physical activities and self-care behaviors were self-

1 reported, so it may be subject to potential recall bias. Third, we excluded older adults who  
2 could not walk independently, as well as those with severe vision and hearing problems, so  
3 findings may not be generalizable to a more heterogeneous population. Fourth, the data  
4 collected from one city would likely not reflect the nation-wide prevalence of frailty. Fifth,  
5 information such as the amount of alcohol consumed weekly for current drinkers and the date  
6 of drinking cessation, as well as the amount of previous alcohol consumption for ex-drinkers  
7 was not collected in this study. Future studies on the relationship between alcohol  
8 consumption and frailty in this population are warranted. Finally, future studies should  
9 explore the effects of clinical and behavioral factors on frailty among community-dwelling  
10 diabetic older adults using a prospective longitudinal design and a larger sample size.

## 11 **CONCLUSIONS**

12 Older adults with type 2 diabetes are at a high risk of frailty in Chinese elderly populations.  
13 Being an ex-drinker, having a higher level of HbA1c, experiencing malnutrition  
14 risk/malnutrition, and suffering from depressive symptoms were risk factors of frailty among  
15 the community-dwelling diabetic older adults; exercise self-care behavior was found to be a  
16 protective factor for frailty. The findings of this study could help guide future studies to  
17 implement targeted and suitable interventions for preventing frailty among community-  
18 dwelling diabetic older adults.

## 19 20 **Acknowledgements**

1  
2  
3  
4 1 The authors wish to thank the administrators, public health nurses, and physicians in the two  
5  
6  
7 2 community health centers for assisting with data collection. We also want to thank the  
8  
9  
10 3 community members for participating in this study.  
11  
12 4

### 14 5 **Author Contributions**

16  
17 6 LK, JL and JM designed the study. LK, HZ and QW collected and managed the data. LK and  
18  
19  
20 7 JF completed the data analysis. LK and JL drafted the manuscript. JB checked and revised  
21  
22  
23 8 the manuscript. All the authors read and approved the final manuscript.  
24  
25 9

### 27 10 **Funding**

28  
29  
30 11 This study was supported by National Natural Science Foundation of China (No. 71503088).  
31  
32  
33 12

### 35 13 **Competing interests**

36  
37  
38 14 None declared.  
39  
40  
41 15

### 43 16 **Patient consent for publication**

44  
45  
46 17 Obtained.  
47  
48  
49 18

### 51 19 **Ethics approval**

52  
53  
54 20 This study was approved by the Medical Ethics Committee of Huazhong University and  
55  
56  
57 21 Science and Technology (No. 2019–S941).  
58  
59  
60 22

---

## 1 Data availability statement

2 Data are available from the first author upon reasonable request. All data relevant to this  
3 study are included in the article.

## 5 Figure 1. Flow chart of inclusion of participants.

## 7 REFERENCES

- 8 1. International Diabetes Federation. IDF diabetes atlas 9th edition. 2019. Available:  
9 <https://www.diabetesatlas.org>.
- 10 2. Wang L, Gao P, Zhang M, *et al*. Prevalence and Ethnic Pattern of Diabetes and Prediabetes  
11 in China in 2013. *Jama* 2017;317:2515-23.
- 12 3. Assar ME, Laosa O, Rodriguez Manas L. Diabetes and frailty. *Curr Opin Clin Nutr Metab*  
13 *Care* 2019;22:52-57.
- 14 4. Morley JE, Vellas B, van Kan GA, *et al*. Frailty consensus: a call to action. *J Am Med Dir*  
15 *Assoc* 2013;14:392-7.
- 16 5. Chhetri JK, Zheng Z, Xu X, *et al*. The prevalence and incidence of frailty in Pre-diabetic  
17 and diabetic community-dwelling older population: results from Beijing longitudinal  
18 study of aging II (BLSA-II). *BMC Geriatr* 2017;17:47.
- 19 6. Garcia-Esquinas E, Graciani A, Guallar-Castillon P, *et al*. Diabetes and risk of frailty and  
20 its potential mechanisms: a prospective cohort study of older adults. *J Am Med Dir*  
21 *Assoc* 2015;16:748-54.

- 1 7. Sinclair AJ, Abdelhafiz AH, Rodriguez-Manas L. Frailty and sarcopenia - newly emerging  
2 and high impact complications of diabetes. *J Diabetes Complications* 2017;31:1465-  
3 73.
- 4 8. Umegaki H. Sarcopenia and frailty in older patients with diabetes mellitus. *Geriatr*  
5 *Gerontol Int* 2016;16:293-9.
- 6 9. Chao CT, Wang J, Chien KL. Both pre-frailty and frailty increase healthcare utilization  
7 and adverse health outcomes in patients with type 2 diabetes mellitus. *Cardiovasc*  
8 *Diabetol* 2018;17:130.
- 9 10. Thein FS, Li Y, Nyunt MSZ, *et al.* Physical frailty and cognitive impairment is associated  
10 with diabetes and adversely impact functional status and mortality. *Postgrad Med*  
11 2018;130:561-67.
- 12 11. Yanagita I, Fujihara Y, Eda T, *et al.* Low glycated hemoglobin level is associated with  
13 severity of frailty in Japanese elderly diabetes patients. *J Diabetes Investig*  
14 2018;9:419-25.
- 15 12. Casals C, Casals Sanchez JL, Suarez Cadenas E, *et al.* [Frailty in older adults with type 2  
16 diabetes mellitus and its relation with glucemic control, lipid profile, blood pressure,  
17 balance, disability grade and nutritional status]. *Nutr Hosp* 2018;35:820-26.
- 18 13. Verlaan S, Ligthart-Melis GC, Wijers SLJ, *et al.* High Prevalence of Physical Frailty  
19 Among Community-Dwelling Malnourished Older Adults-A Systematic Review and  
20 Meta-Analysis. *J Am Med Dir Assoc* 2017;18:374-82.



- 1 14. Wei K, Nyunt MSZ, Gao Q, *et al.* Frailty and Malnutrition: Related and Distinct  
2 Syndrome Prevalence and Association among Community-Dwelling Older Adults:  
3 Singapore Longitudinal Ageing Studies. *J Am Med Dir Assoc* 2017;18:1019-28.
- 4 15. Aprahamian I, Suemoto CK, Lin SM, *et al.* Depression is associated with self-rated frailty  
5 in older adults from an outpatient clinic: a prospective study. *Int Psychogeriatr*  
6 2019;31:425-34.
- 7 16. Soysal P, Veronese N, Thompson T, *et al.* Relationship between depression and frailty in  
8 older adults: A systematic review and meta-analysis. *Ageing Res Rev* 2017;36:78-87.
- 9 17. Toobert DJ, Hampson SE, Glasgow RE. The summary of diabetes self-care activities  
10 measure: results from 7 studies and a revised scale. *Diabetes Care* 2000;23:943-50.
- 11 18. Cai C, Jia WP. Community healthcare for diabetes in China (In Chinese). *Scientia*  
12 *Sinica(Vitae)* 2018;48:820-26.
- 13 19. Pourhoseingholi MA, Vahedi M, Rahimzadeh M. Sample size calculation in medical  
14 studies. *Gastroenterol Hepatol Bed Bench* 2013;6:14-7.
- 15 20. Zhou BF. Predictive values of body mass index and waist circumference for risk factors  
16 of certain related diseases in Chinese adults--study on optimal cut-off points of body  
17 mass index and waist circumference in Chinese adults. *Biomed Environ Sci*  
18 2002;15:83-96.
- 19 21. Fried LP, Tangen CM, Walston J, *et al.* Frailty in older adults: evidence for a phenotype.  
20 *J Gerontol A Biol Sci Med Sci* 2001;56:M146-56.

- 
- 1 22. Auyeung TW, Lee JS, Leung J, *et al.* The selection of a screening test for frailty  
2 identification in community-dwelling older adults. *J Nutr Health Aging* 2014;18:199-  
3 203.
- 4 23. Wu CY, Su TP, Fang CL, *et al.* Sleep quality among community-dwelling elderly people  
5 and its demographic, mental, and physical correlates. *J Chin Med Assoc* 2012;75:75-  
6 80.
- 7 24. Guigoz Y, Vellas B, Garry PJ. Assessing the nutritional status of the elderly: The Mini  
8 Nutritional Assessment as part of the geriatric evaluation. *Nutr Rev* 1996;54:S59-65.
- 9 25. Han Y, Li S, Zheng Y. Predictors of nutritional status among community-dwelling older  
10 adults in Wuhan, China. *Public Health Nutr* 2009;12:1189-96.
- 11 26. Sheikh JI, Yesavage JA. Geriatric Depression Scale (GDS): Recent evidence and  
12 development of a shorter version. *Clinical Gerontologist* 1986;5:165–73.
- 13 27. Lee H-cB, Chiu HFK, Kowk WY, *et al.* Chinese elderly and the GDS short form: A  
14 preliminary study. *Clinical Gerontologist* 1993;14:37–42.
- 15 28. Wan QQ, Shang SM, Lai XB, *et al.* Study on the reliability and validity of summary of  
16 diabetes self-care activities for type 2 diabetes patients (In Chinese). *Chin J Prac Nurs*  
17 2008;24:26-27.
- 18 29. Li ET, Tang EK, Wong CY, *et al.* Predicting stature from knee height in Chinese elderly  
19 subjects. *Asia Pac J Clin Nutr* 2000;9:252-5.
- 20 30. Ottenbacher KJ, Graham JE, Al Snih S, *et al.* Mexican Americans and frailty: findings  
21 from the Hispanic established populations epidemiologic studies of the elderly. *Am J*  
22 *Public Health* 2009;99:673-9.

- 1  
2  
3  
4 1 31. Kojima G, Liljas A, Iliffe S, *et al.* A systematic review and meta-analysis of prospective  
5  
6  
7 2 associations between alcohol consumption and incident frailty. *Age Ageing*  
8  
9 3 2018;47:26-34.  
10  
11  
12 4 32. Ortola R, Garcia-Esquinas E, Leon-Munoz LM, *et al.* Patterns of Alcohol Consumption  
13  
14 5 and Risk of Frailty in Community-dwelling Older Adults. *J Gerontol A Biol Sci Med*  
15  
16 6 *Sci* 2016;71:251-8.  
17  
18  
19 7 33. Shah M, Paulson D, Nguyen V. Alcohol Use and Frailty Risk among Older Adults over  
20  
21 8 12 Years: The Health and Retirement Study. *Clin Gerontol* 2018;41:315-25.  
22  
23  
24 9 34. Kojima G, Jivraj S, Iliffe S, *et al.* Alcohol Consumption and Risk of Incident Frailty: The  
25  
26 10 English Longitudinal Study of Aging. *J Am Med Dir Assoc* 2019;20:725-29.  
27  
28  
29 11 35. Shah M, Paulson D. C-reactive protein level partially mediates the relationship between  
30  
31 12 moderate alcohol use and frailty: the Health and Retirement Study. *Age Ageing*  
32  
33 13 2016;45:874-78.  
34  
35  
36 14 36. Sheetz MJ, King GL. Molecular understanding of hyperglycemia's adverse effects for  
37  
38 15 diabetic complications. *Jama* 2002;288:2579-88.  
39  
40  
41 16 37. Phielix E, Schrauwen-Hinderling VB, Mensink M, *et al.* Lower intrinsic ADP-stimulated  
42  
43 17 mitochondrial respiration underlies in vivo mitochondrial dysfunction in muscle of  
44  
45 18 male type 2 diabetic patients. *Diabetes* 2008;57:2943-9.  
46  
47  
48 19 38. Zaslavsky O, Walker RL, Crane PK, *et al.* Glucose Levels and Risk of Frailty. *J Gerontol*  
49  
50 20 *A Biol Sci Med Sci* 2016;71:1223-9.  
51  
52  
53 21 39. Mathur S, Zammitt NN, Frier BM. Optimal glycaemic control in elderly people with type  
54  
55 22 2 diabetes: what does the evidence say? *Drug Saf* 2015;38:17-32.  
56  
57  
58  
59  
60

- 1  
2  
3
- 
- 4 1 40. International Diabetes Federation. Managing Older People with Type 2 Diabetes: Global  
5  
6  
7 2 Guideline. 2013. Available: [https://www.idf.org/e-library/guidelines/78-global-](https://www.idf.org/e-library/guidelines/78-global-guideline-for-managing-older-people-with-type-2-diabetes.html)  
8  
9 3 [guideline-for-managing-older-people-with-type-2-diabetes.html](https://www.idf.org/e-library/guidelines/78-global-guideline-for-managing-older-people-with-type-2-diabetes.html).  
10  
11
- 12 4 41. Sinclair AJ, Abdelhafiz A, Dunning T, *et al*. An International Position Statement on the  
13  
14 5 Management of Frailty in Diabetes Mellitus: Summary of Recommendations 2017. *J*  
15  
16 6 *Frailty Aging* 2018;7:10-20.  
17  
18
- 19 7 42. Liu GX, Chen Y, Yang YX, *et al*. Pilot study of the Mini Nutritional Assessment on  
20  
21 8 predicting outcomes in older adults with type 2 diabetes. *Geriatr Gerontol Int*  
22  
23 9 2017;17:2485-92.  
24  
25  
26
- 27 10 43. Vischer UM, Perrenoud L, Genet C, *et al*. The high prevalence of malnutrition in elderly  
28  
29 11 diabetic patients: implications for anti-diabetic drug treatments. *Diabet Med*  
30  
31 12 2010;27:918-24.  
32  
33  
34
- 35 13 44. McClinchy J. Dietary management of older people with diabetes. *Br J Community Nurs*  
36  
37 14 2018;23:248-51.  
38  
39
- 40 15 45. Park M, Reynolds CF, 3rd. Depression among older adults with diabetes mellitus. *Clin*  
41  
42 16 *Geriatr Med* 2015;31:117-37, ix.  
43  
44
- 45 17 46. Darwish L, Beroncal E, Sison MV, *et al*. Depression in people with type 2 diabetes:  
46  
47 18 current perspectives. *Diabetes Metab Syndr Obes* 2018;11:333-43.  
48  
49
- 50 19 47. Aguirre LE, Villareal DT. Physical Exercise as Therapy for Frailty. *Nestle Nutr Inst*  
51  
52 20 *Workshop Ser* 2015;83:83-92.  
53  
54  
55  
56  
57  
58  
59  
60

---

1 48. de Labra C, Guimaraes-Pinheiro C, Maseda A, *et al.* Effects of physical exercise  
2 interventions in frail older adults: a systematic review of randomized controlled trials.  
3 *BMC Geriatr* 2015;15:154.

4 49. Pariser G, Hager K, Gillette P, *et al.* Active steps for diabetes: a community-campus  
5 partnership addressing frailty and diabetes. *Diabetes Educ* 2014;40:60-7.

For peer review only

1 **Table 1** Sociodemographic characteristics of the participants by different frailty statuses

| Variables                                  | Total<br>(n=291)<br>N (%) | Robust<br>(n=85)<br>N (%) | Pre-frail<br>(n=150)<br>N (%) | Frail<br>(n=56)<br>N (%) | P value      |
|--------------------------------------------|---------------------------|---------------------------|-------------------------------|--------------------------|--------------|
| Age (years)                                |                           |                           |                               |                          | 0.295        |
| 65-69                                      | 154 (52.9)                | 52 (61.2)                 | 74 (49.3)                     | 28 (50.0)                |              |
| 70-74                                      | 91 (31.3)                 | 25 (29.4)                 | 49 (32.7)                     | 17 (30.4)                |              |
| ≥75                                        | 46 (15.8)                 | 8 (9.4)                   | 27 (18.0)                     | 11 (19.6)                |              |
| Gender                                     |                           |                           |                               |                          | 0.270        |
| Male                                       | 137 (47.1)                | 41 (48.2)                 | 75 (50.0)                     | 21 (37.5)                |              |
| Female                                     | 154 (52.9)                | 44 (51.8)                 | 75 (50.0)                     | 35 (62.5)                |              |
| Living place                               |                           |                           |                               |                          | 0.434        |
| Urban                                      | 246 (84.5)                | 75 (88.2)                 | 126 (84.0)                    | 45 (80.4)                |              |
| Rural                                      | 45 (15.5)                 | 10 (11.8)                 | 24 (16.0)                     | 11 (19.6)                |              |
| Education level                            |                           |                           |                               |                          | <b>0.077</b> |
| Illiterate                                 | 42 (14.4)                 | 8 (9.4)                   | 18 (12.0)                     | 16 (28.6)                |              |
| Elementary school                          | 63 (21.6)                 | 18 (21.2)                 | 34 (22.7)                     | 11 (19.6)                |              |
| Junior high school                         | 95 (32.6)                 | 27 (31.8)                 | 50 (33.3)                     | 18 (32.1)                |              |
| Senior high school                         | 55 (18.9)                 | 19 (22.4)                 | 28 (18.7)                     | 8 (14.3)                 |              |
| College or over                            | 36 (12.4)                 | 13 (15.3)                 | 20 (13.3)                     | 3 (5.4)                  |              |
| Marital status                             |                           |                           |                               |                          | 0.658        |
| Spouse                                     | 233 (80.1)                | 66 (77.6)                 | 120 (80.0)                    | 47 (83.9)                |              |
| No spouse                                  | 58 (19.9)                 | 19 (22.4)                 | 30 (20.0)                     | 9 (16.1)                 |              |
| Living status                              |                           |                           |                               |                          | 0.279        |
| Living with others                         | 253 (86.9)                | 71 (83.5)                 | 135 (90.0)                    | 47 (83.9)                |              |
| Living alone                               | 38 (13.1)                 | 14 (16.5)                 | 15 (10.0)                     | 9 (16.1)                 |              |
| Currently working                          |                           |                           |                               |                          | 0.197        |
| Yes                                        | 23 (7.9)                  | 10 (11.8)                 | 11 (7.3)                      | 2 (3.6)                  |              |
| No                                         | 268 (92.1)                | 75 (88.2)                 | 139 (92.7)                    | 54 (96.4)                |              |
| Personal monthly income<br>(Chinese Yuan)  |                           |                           |                               |                          | <b>0.026</b> |
| <1000                                      | 43 (14.8)                 | 7 (8.2)                   | 20 (13.3)                     | 16 (28.6)                |              |
| 1000-1999                                  | 50 (17.2)                 | 14 (16.5)                 | 27 (18.0)                     | 9 (16.1)                 |              |
| 2000-2999                                  | 100 (34.4)                | 34 (40.0)                 | 47 (31.3)                     | 19 (33.9)                |              |
| ≥3000                                      | 98 (33.7)                 | 30 (35.3)                 | 56 (37.3)                     | 12 (21.4)                |              |
| Medical insurance                          |                           |                           |                               |                          | <b>0.034</b> |
| Urban residential<br>insurance             | 79 (27.1)                 | 17 (20.0)                 | 42 (28.0)                     | 20 (35.7)                |              |
| Urban employees'<br>insurance              | 169 (58.1)                | 56 (65.9)                 | 90 (60.0)                     | 23 (41.1)                |              |
| New rural cooperative<br>medical insurance | 43 (14.8)                 | 12 (14.1)                 | 18 (12.0)                     | 13 (23.2)                |              |

2

1 **Table 2** Lifestyle and clinical characteristics of the participants by different frailty statuses

| Variables                       | Total<br>(n=291) | Robust<br>(n=85) | Pre-frail<br>(n=150) | Frail<br>(n=56)  | P value      |
|---------------------------------|------------------|------------------|----------------------|------------------|--------------|
| N (%) / Median (IQR)            |                  |                  |                      |                  |              |
| Smoking                         |                  |                  |                      |                  | 0.612        |
| Non-smoker                      | 185 (63.6)       | 54 (63.5)        | 93 (62.0)            | 38 (67.9)        |              |
| Ex-smoker                       | 69 (23.7)        | 17 (20.0)        | 39 (26.0)            | 13 (23.2)        |              |
| Current smoker                  | 37 (12.7)        | 14 (16.5)        | 18 (12.0)            | 5 (8.9)          |              |
| Alcohol Drinking                |                  |                  |                      |                  | <b>0.004</b> |
| Non-drinker                     | 167 (57.4)       | 50 (58.8)        | 76 (50.7)            | 41 (73.2)        |              |
| Ex-drinker                      | 46 (15.8)        | 7 (8.2)          | 30 (20.0)            | 9 (16.1)         |              |
| Current drinker                 | 78 (26.8)        | 28 (32.9)        | 44 (29.3)            | 6 (10.7)         |              |
| Sleep duration at night (hours) |                  |                  |                      |                  | <b>0.046</b> |
| <5                              | 75 (25.8)        | 14 (16.5)        | 39 (26.0)            | 22 (39.3)        |              |
| 5-8                             | 192 (66.0)       | 64 (75.3)        | 99 (66.0)            | 29 (51.8)        |              |
| >8                              | 24 (8.2)         | 7 (8.2)          | 12 (8.0)             | 5 (8.9)          |              |
| Self-rated sleep quality        |                  |                  |                      |                  | <b>0.065</b> |
| Very good                       | 33 (11.3)        | 14 (16.5)        | 17 (11.3)            | 2 (3.6)          |              |
| Good                            | 145 (49.8)       | 44 (51.8)        | 77 (51.3)            | 24 (42.9)        |              |
| Bad                             | 89 (30.6)        | 24 (28.2)        | 42 (28.0)            | 23 (41.1)        |              |
| Very bad                        | 24 (8.2)         | 3 (3.5)          | 14 (9.3)             | 7 (12.5)         |              |
| Duration of diabetes (years)    | 10 (4-16)        | 9 (4-16)         | 11 (5-16)            | 7 (4-13)         | <b>0.036</b> |
| Number of comorbidities         | 5 (3-6)          | 4 (3-6)          | 5 (3-6)              | 5 (4-7)          | <b>0.030</b> |
| Polypharmacy                    |                  |                  |                      |                  | <b>0.025</b> |
| No                              | 205 (70.4)       | 68 (80.0)        | 104 (69.3)           | 33 (58.9)        |              |
| Yes                             | 86 (29.6)        | 17 (20.0)        | 46 (30.7)            | 23 (41.1)        |              |
| BMI (kg/m <sup>2</sup> )        |                  |                  |                      |                  | 0.321        |
| <18.5                           | 11 (3.8)         | 0 (0)            | 8 (5.3)              | 3 (5.4)          |              |
| 18.5-23.9                       | 127 (43.6)       | 37 (43.5)        | 65 (43.3)            | 25 (44.6)        |              |
| 24-27.9                         | 114 (39.2)       | 38 (44.7)        | 58 (38.7)            | 18 (32.1)        |              |
| ≥28                             | 39 (13.4)        | 10 (11.8)        | 19 (12.7)            | 10 (17.9)        |              |
| Waist circumference             |                  |                  |                      |                  | 0.285        |
| Normal                          | 51 (17.5)        | 11 (12.9)        | 27 (18.0)            | 13 (23.2)        |              |
| High                            | 240 (82.5)       | 74 (87.1)        | 123 (82.0)           | 43 (76.8)        |              |
| HbA1c (%)                       | 6.66 (5.87-7.47) | 6.74 (5.96-7.20) | 6.48 (5.72-7.26)     | 6.97 (5.95-8.42) | <b>0.055</b> |

2 IQR, interquartile range; BMI, body mass index; HbA1c, glycated hemoglobin.

3

4

**Table 3** Malnutrition, depression and diabetes self-care behaviors of the participants by different frailty statuses

| Variables                      | Possible range | Actual range | Total (n=291) | Robust (n=85) | Pre-frail (n=150) | Frail (n=56) | P value          |
|--------------------------------|----------------|--------------|---------------|---------------|-------------------|--------------|------------------|
| N (%) / Median (IQR)           |                |              |               |               |                   |              |                  |
| Malnutrition risk/malnutrition |                |              |               |               |                   |              | <b>&lt;0.001</b> |
| No                             |                |              | 189 (64.9)    | 76 (89.4)     | 96 (64.0)         | 17 (30.4)    |                  |
| Yes                            |                |              | 102 (35.1)    | 9 (10.6)      | 54 (36.0)         | 39 (69.6)    |                  |
| GDS-15 score                   | 0-15           | 0-15         | 3 (1-5)       | 1 (0-3)       | 3 (1-5)           | 5 (4-8)      | <b>&lt;0.001</b> |
| SDSCA score                    |                |              |               |               |                   |              |                  |
| General diet score             | 0-14           | 0-14         | 14 (10-14)    | 14 (10-14)    | 14 (10-14)        | 14 (10-14)   | 0.465            |
| Specific diet score            | 0-14           | 0-14         | 8 (7-12)      | 10 (7-13)     | 7 (7-12)          | 7 (7-12)     | 0.131            |
| Exercise score                 | 0-14           | 0-14         | 7 (7-14)      | 14 (7-14)     | 7 (7-14)          | 7 (0-7)      | <b>&lt;0.001</b> |
| Blood-glucose testing score    | 0-14           | 0-14         | 0 (0-2)       | 0 (0-2)       | 0 (0-2)           | 0 (0-1)      | 0.183            |
| Foot care score                | 0-14           | 0-14         | 0 (0-7)       | 0 (0-7)       | 0 (0-7)           | 0 (0-0)      | <b>0.007</b>     |
| Medication care score          | 0-7            | 0-7          | 7 (7-7)       | 7 (7-7)       | 7 (7-7)           | 7 (7-7)      | <b>0.060</b>     |

IQR, interquartile range; GDS-15, Geriatric Depression Scale-15; SDSCA, Summary of Diabetes Self-Care Activities.



**Table 4** Logistic regression model of predictors for pre-frailty and frailty

|                                | Pre-frail |                 |              | Frail |                 |                  |
|--------------------------------|-----------|-----------------|--------------|-------|-----------------|------------------|
|                                | OR        | 95% CI          | P value      | OR    | 95% CI          | P value          |
| Alcohol Drinking               |           |                 |              |       |                 |                  |
| Ex-drinker                     | 3.664     | 1.260 to 10.653 | <b>0.017</b> | 4.461 | 1.079 to 18.438 | <b>0.039</b>     |
| Current drinker                | 1.416     | 0.680 to 2.950  | 0.353        | 0.266 | 0.069 to 1.026  | 0.055            |
| Non-drinker                    | 1         | -               | -            | 1     | -               | -                |
| HbA1c                          | 0.830     | 0.644 to 1.071  | 0.152        | 1.434 | 1.045 to 1.968  | <b>0.026</b>     |
| Malnutrition risk/Malnutrition |           |                 |              |       |                 |                  |
| Yes                            | 2.806     | 1.133 to 6.950  | <b>0.026</b> | 8.062 | 2.470 to 26.317 | <b>0.001</b>     |
| No                             | 1         | -               | -            | 1     | -               | -                |
| GDS-15 score                   | 1.285     | 1.087 to 1.520  | <b>0.003</b> | 1.438 | 1.166 to 1.773  | <b>0.001</b>     |
| Exercise score                 | 0.906     | 0.843 to 0.974  | <b>0.008</b> | 0.796 | 0.716 to 0.884  | <b>&lt;0.001</b> |

GDS-15, Geriatric Depression Scale-15.

1  
2  
3  
4  
5  
6  
7  
8  
9  
10  
11  
12  
13  
14  
15  
16  
17  
18  
19  
20  
21  
22  
23  
24  
25  
26  
27  
28  
29  
30  
31  
32  
33  
34  
35  
36  
37  
38  
39  
40  
41  
42  
43  
44  
45  
46  
47  
48  
49  
50  
51  
52  
53  
54  
55  
56  
57  
58  
59  
60

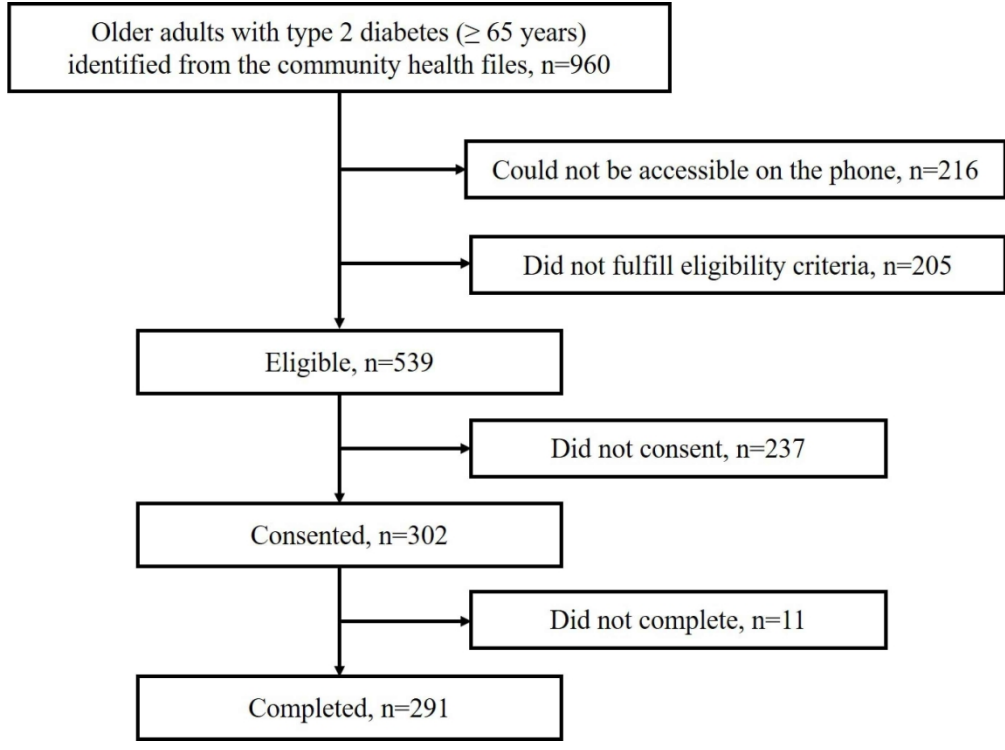

Flow chart of inclusion of participants

234x173mm (300 x 300 DPI)

**STROBE 2007 (v4) Statement—Checklist of items that should be included in reports of *cross-sectional studies***

| Section/Topic                | Item # | Recommendation                                                                                                                                                                       | Reported on page # |
|------------------------------|--------|--------------------------------------------------------------------------------------------------------------------------------------------------------------------------------------|--------------------|
| <b>Title and abstract</b>    | 1      | (a) Indicate the study's design with a commonly used term in the title or the abstract                                                                                               | 1-2                |
|                              |        | (b) Provide in the abstract an informative and balanced summary of what was done and what was found                                                                                  | 2                  |
| <b>Introduction</b>          |        |                                                                                                                                                                                      |                    |
| Background/rationale         | 2      | Explain the scientific background and rationale for the investigation being reported                                                                                                 | 4-5                |
| Objectives                   | 3      | State specific objectives, including any prespecified hypotheses                                                                                                                     | 5                  |
| <b>Methods</b>               |        |                                                                                                                                                                                      |                    |
| Study design                 | 4      | Present key elements of study design early in the paper                                                                                                                              | 6                  |
| Setting                      | 5      | Describe the setting, locations, and relevant dates, including periods of recruitment, exposure, follow-up, and data collection                                                      | 6                  |
| Participants                 | 6      | (a) Give the eligibility criteria, and the sources and methods of selection of participants                                                                                          | 7                  |
| Variables                    | 7      | Clearly define all outcomes, exposures, predictors, potential confounders, and effect modifiers. Give diagnostic criteria, if applicable                                             | 10                 |
| Data sources/<br>measurement | 8*     | For each variable of interest, give sources of data and details of methods of assessment (measurement). Describe comparability of assessment methods if there is more than one group | 7-10               |
| Bias                         | 9      | Describe any efforts to address potential sources of bias                                                                                                                            | 9-10               |
| Study size                   | 10     | Explain how the study size was arrived at                                                                                                                                            | 7                  |
| Quantitative variables       | 11     | Explain how quantitative variables were handled in the analyses. If applicable, describe which groupings were chosen and why                                                         | 10                 |
| Statistical methods          | 12     | (a) Describe all statistical methods, including those used to control for confounding                                                                                                | 10                 |
|                              |        | (b) Describe any methods used to examine subgroups and interactions                                                                                                                  |                    |
|                              |        | (c) Explain how missing data were addressed                                                                                                                                          |                    |
|                              |        | (d) If applicable, describe analytical methods taking account of sampling strategy                                                                                                   |                    |
|                              |        | (e) Describe any sensitivity analyses                                                                                                                                                |                    |
| <b>Results</b>               |        |                                                                                                                                                                                      |                    |

|                          |     |                                                                                                                                                                                                              |       |
|--------------------------|-----|--------------------------------------------------------------------------------------------------------------------------------------------------------------------------------------------------------------|-------|
| Participants             | 13* | (a) Report numbers of individuals at each stage of study—eg numbers potentially eligible, examined for eligibility, confirmed eligible, included in the study, completing follow-up, and analysed            | 11    |
|                          |     | (b) Give reasons for non-participation at each stage                                                                                                                                                         | 11    |
|                          |     | (c) Consider use of a flow diagram                                                                                                                                                                           | 11    |
| Descriptive data         | 14* | (a) Give characteristics of study participants (eg demographic, clinical, social) and information on exposures and potential confounders                                                                     | 11-12 |
|                          |     | (b) Indicate number of participants with missing data for each variable of interest                                                                                                                          |       |
| Outcome data             | 15* | Report numbers of outcome events or summary measures                                                                                                                                                         | 11    |
| Main results             | 16  | (a) Give unadjusted estimates and, if applicable, confounder-adjusted estimates and their precision (eg, 95% confidence interval). Make clear which confounders were adjusted for and why they were included | 12    |
|                          |     | (b) Report category boundaries when continuous variables were categorized                                                                                                                                    | 26-27 |
|                          |     | (c) If relevant, consider translating estimates of relative risk into absolute risk for a meaningful time period                                                                                             |       |
| Other analyses           | 17  | Report other analyses done—eg analyses of subgroups and interactions, and sensitivity analyses                                                                                                               |       |
| <b>Discussion</b>        |     |                                                                                                                                                                                                              |       |
| Key results              | 18  | Summarise key results with reference to study objectives                                                                                                                                                     | 13    |
| Limitations              | 19  | Discuss limitations of the study, taking into account sources of potential bias or imprecision. Discuss both direction and magnitude of any potential bias                                                   | 16-17 |
| Interpretation           | 20  | Give a cautious overall interpretation of results considering objectives, limitations, multiplicity of analyses, results from similar studies, and other relevant evidence                                   | 13-17 |
| Generalisability         | 21  | Discuss the generalisability (external validity) of the study results                                                                                                                                        | 17    |
| <b>Other information</b> |     |                                                                                                                                                                                                              |       |
| Funding                  | 22  | Give the source of funding and the role of the funders for the present study and, if applicable, for the original study on which the present article is based                                                | 18    |

\*Give information separately for cases and controls in case-control studies and, if applicable, for exposed and unexposed groups in cohort and cross-sectional studies.

**Note:** An Explanation and Elaboration article discusses each checklist item and gives methodological background and published examples of transparent reporting. The STROBE checklist is best used in conjunction with this article (freely available on the Web sites of PLoS Medicine at <http://www.plosmedicine.org/>, Annals of Internal Medicine at <http://www.annals.org/>, and Epidemiology at <http://www.epidem.com/>). Information on the STROBE Initiative is available at [www.strobe-statement.org](http://www.strobe-statement.org).

# BMJ Open

## Predictors of frailty among Chinese community-dwelling older adults with type 2 diabetes: A cross-sectional survey

|                                 |                                                                                                                                                                                                                                                                                                                                                                                                                                                                                                                                                                                                                                                                                                                                                   |
|---------------------------------|---------------------------------------------------------------------------------------------------------------------------------------------------------------------------------------------------------------------------------------------------------------------------------------------------------------------------------------------------------------------------------------------------------------------------------------------------------------------------------------------------------------------------------------------------------------------------------------------------------------------------------------------------------------------------------------------------------------------------------------------------|
| Journal:                        | <i>BMJ Open</i>                                                                                                                                                                                                                                                                                                                                                                                                                                                                                                                                                                                                                                                                                                                                   |
| Manuscript ID                   | bmjopen-2020-041578.R2                                                                                                                                                                                                                                                                                                                                                                                                                                                                                                                                                                                                                                                                                                                            |
| Article Type:                   | Original research                                                                                                                                                                                                                                                                                                                                                                                                                                                                                                                                                                                                                                                                                                                                 |
| Date Submitted by the Author:   | 11-Dec-2020                                                                                                                                                                                                                                                                                                                                                                                                                                                                                                                                                                                                                                                                                                                                       |
| Complete List of Authors:       | Kong, Linglin; Huazhong University of Science and Technology, Tongji Medical College, School of Nursing ; Hubei University Of Science and Technology, School of Nursing<br>Zhao, Huimin; Huazhong University of Science and Technology, Tongji Medical College, School of Nursing<br>Fan, Junyao; Huazhong University of Science and Technology, Tongji Medical College, School of Nursing<br>Wang, Quan; Huazhong University of Science and Technology, Tongji Medical College, School of Nursing<br>Li, Jie; Huazhong University of Science and Technology, Tongji Medical College, School of Nursing<br>Bai, Jinbing; Emory University,<br>Mao, Jing; Huazhong University of Science and Technology, Tongji Medical College, School of Nursing |
| <b>Primary Subject Heading</b>: | Geriatric medicine                                                                                                                                                                                                                                                                                                                                                                                                                                                                                                                                                                                                                                                                                                                                |
| Secondary Subject Heading:      | Diabetes and endocrinology, Geriatric medicine                                                                                                                                                                                                                                                                                                                                                                                                                                                                                                                                                                                                                                                                                                    |
| Keywords:                       | GERIATRIC MEDICINE, PRIMARY CARE, General diabetes < DIABETES & ENDOCRINOLOGY                                                                                                                                                                                                                                                                                                                                                                                                                                                                                                                                                                                                                                                                     |
|                                 |                                                                                                                                                                                                                                                                                                                                                                                                                                                                                                                                                                                                                                                                                                                                                   |

SCHOLARONE™  
Manuscripts



I, the Submitting Author has the right to grant and does grant on behalf of all authors of the Work (as defined in the below author licence), an exclusive licence and/or a non-exclusive licence for contributions from authors who are: i) UK Crown employees; ii) where BMJ has agreed a CC-BY licence shall apply, and/or iii) in accordance with the terms applicable for US Federal Government officers or employees acting as part of their official duties; on a worldwide, perpetual, irrevocable, royalty-free basis to BMJ Publishing Group Ltd ("BMJ") its licensees and where the relevant Journal is co-owned by BMJ to the co-owners of the Journal, to publish the Work in this journal and any other BMJ products and to exploit all rights, as set out in our [licence](#).

The Submitting Author accepts and understands that any supply made under these terms is made by BMJ to the Submitting Author unless you are acting as an employee on behalf of your employer or a postgraduate student of an affiliated institution which is paying any applicable article publishing charge ("APC") for Open Access articles. Where the Submitting Author wishes to make the Work available on an Open Access basis (and intends to pay the relevant APC), the terms of reuse of such Open Access shall be governed by a Creative Commons licence – details of these licences and which [Creative Commons](#) licence will apply to this Work are set out in our licence referred to above.

Other than as permitted in any relevant BMJ Author's Self Archiving Policies, I confirm this Work has not been accepted for publication elsewhere, is not being considered for publication elsewhere and does not duplicate material already published. I confirm all authors consent to publication of this Work and authorise the granting of this licence.

---

1 **Predictors of frailty among Chinese community-dwelling older adults with type 2**  
2 **diabetes: A cross-sectional survey**

3 Linglin Kong,<sup>1,2</sup> Huimin Zhao,<sup>1</sup> Junyao Fan,<sup>1</sup> Quan Wang,<sup>1</sup> Jie Li,<sup>1</sup> Jinbing Bai,<sup>3</sup> Jing Mao<sup>1</sup>

4 <sup>1</sup>School of Nursing, Tongji Medical College, Huazhong University of Science and  
5 Technology, Wuhan, Hubei, China

6 <sup>2</sup>School of Nursing, Hubei University of Science and Technology, Xianning, Hubei, China

7 <sup>3</sup>Nell Hodgson Woodruff School of Nursing, Emory University, Atlanta, Georgia, USA

8  
9 **Corresponding authors:**

10 Jie Li, MSN, PhD, RN

11 Associate Professor

12 E-mail: lijie@hust.edu.cn

13 Tel.: + 86 18971097091

14

15 Jing Mao, MD, PhD

16 Professor

17 E-mail: maojing@hust.edu.cn

18 Tel.: + 86 13317135988

19

20 **Word count: 3713**

21

22

---

## 1 ABSTRACT

2 **Objectives:** To assess the prevalence of frailty and identify predictors of frailty among  
3 Chinese community-dwelling older adults with type 2 diabetes.

4 **Design:** A cross-sectional design.

5 **Setting:** Two community health centers in central China.

6 **Participants:** 291 community-dwelling older adults aged  $\geq 65$  years with type 2 diabetes.

7 **Main outcome measures:** Data were collected via face-to-face interviews, anthropometric  
8 measurements, laboratory tests, and community health files. The main outcome measure was  
9 frailty, as assessed by the frailty phenotype criteria. The multivariate logistic regression  
10 model was used to identify the predictors of frailty.

11 **Results:** The prevalence of pre-frailty and frailty were 51.5% and 19.2%, respectively. The  
12 significant predictors of frailty included alcohol drinking (ex-drinker) (OR = 4.461, 95% CI  
13 1.079 to 18.438), glycated hemoglobin (HbA1c) (OR = 1.434, 95% CI 1.045 to 1.968),  
14 nutritional status (malnutrition risk/malnutrition) (OR = 8.062, 95% CI 2.470 to 26.317),  
15 depressive symptoms (OR = 1.438, 95% CI 1.166 to 1.773), and exercise behavior (OR =  
16 0.796, 95% CI 0.716 to 0.884).

17 **Conclusions:** A high prevalence of frailty was found among older adults with type 2 diabetes  
18 in the Chinese community. Frailty identification and multi-faceted interventions should be  
19 developed for this population, taking into consideration proper glycemic control, nutritional  
20 instruction, depressive symptoms improvement, and enhancement of self-care behaviors.



---

## 1 ARTICLE SUMMARY

### 2 Strengths and limitations of this study

- 3 • The study evaluated an extensive list of sociodemographic factors, lifestyle and clinical  
4 characteristics, nutritional status, depressive symptoms, and diabetes self-care behaviors that  
5 could influence the frailty status of community-dwelling older adults with type 2 diabetes.
- 6 • The study examined which domains of diabetes self-care behaviors were associated with  
7 frailty among diabetic older adults.
- 8 • The study is a cross-sectional study, so a causal relationship between factors associated  
9 with frailty could not be established.
- 10 • The study was conducted in one city of China, which may affect the generalizability of the  
11 findings.

### 14 KEYWORDS

15 Community-dwelling older adults; frailty; predictors; type 2 diabetes.

---

## 1 INTRODUCTION

2 Across the world, the estimated number of people aged 65–99 years with diabetes was 136  
3 million (19.3%) in 2019, and this number is estimated to increase to 195 million in 2030 and  
4 276 million in 2045.<sup>1</sup> China had the world's largest number of adults with diabetes,<sup>1</sup> and the  
5 prevalence of older Chinese adults with diabetes over the age of 60 was 20.2% in the latest  
6 national survey.<sup>2</sup> Elderly people with type 2 diabetes are at risk for developing frailty,<sup>3</sup> a  
7 geriatric syndrome manifesting as a reduction in one's physical strength, endurance, and  
8 physiologic function that increases the likelihood of developing functional dependency and  
9 death.<sup>4</sup> Diabetic people are more likely to be frail than their non-diabetic counterparts.<sup>5 6</sup> This  
10 relationship between diabetes and frailty may be explained by the fact that diabetes impairs  
11 skeletal muscle function, vascular function, and hormonal milieu, as well as accelerates  
12 sarcopenia, thereby leading to increased frailty.<sup>3 7 8</sup>

13 Frailty is associated with higher disability, mortality, cardiovascular events, and  
14 healthcare utilization among older adults with type 2 diabetes.<sup>9 10</sup> Identifying the associated  
15 factors for frailty among older adults with diabetes may help to improve their health  
16 outcomes. A few studies have shown that sociodemographic factors (e.g., age, education  
17 level),<sup>6 11</sup> physical factors (e.g., systolic blood pressure, bodyweight, abdominal obesity),<sup>6 11</sup>  
18 <sup>12</sup> and biological factors (e.g., glycated hemoglobin [HbA1c], albumin, high-density  
19 lipoprotein cholesterol)<sup>6 11</sup> were associated with frailty in diabetic older adults. Until now,  
20 important, modifiable factors such as nutritional status, psychological well-being, and self-  
21 care behavioral factors were rarely studied among community-dwelling diabetic older adults.

1 The association between malnutrition and frailty has been established among  
2 community-dwelling older adults.<sup>13 14</sup> Depression is another common factor associated with  
3 frailty among the elderly.<sup>15 16</sup> However, there is a lack of understanding of the impact of  
4 malnutrition and depression on frailty among the specific diabetic older population. Diabetic  
5 older adults should adopt numerous diabetes self-care behaviors to control their disease; these  
6 behaviors include proper diet, regular exercise, self-monitoring of blood glucose, proper foot  
7 care, and strict adherence to prescribed medications.<sup>17</sup> Nevertheless, there is a dearth of  
8 studies on which domains of diabetes self-care behaviors are preferentially associated with  
9 frailty. Examining these associations is important for developing specific interventions to  
10 reduce the risk of frailty for diabetic older people.

11 In China, there is an increasing number of older people with type 2 diabetes living in  
12 the community, and the health management of the diabetic elderly population is the focus of  
13 many community health services; however, frailty is not among the physical conditions that  
14 is routinely screened for in this population.<sup>18</sup> Little is known about the frailty status among  
15 the community-dwelling older adults with type 2 diabetes in China. To our knowledge, only  
16 one study reported the prevalence of frailty in a community-dwelling diabetic population in  
17 mainland China; however, that study included a sample of diabetic people aged 55 years and  
18 older, identifying the risk factors of frailty among an elevated blood glucose (pre-diabetes  
19 and diabetes) population.<sup>5</sup> Therefore, the aims of this study were to assess the prevalence of  
20 frailty and explore the predictors of frailty among Chinese community-dwelling older adults  
21 with type 2 diabetes.

## 22 **METHODS**

---

## 1 **Study design and setting**

2 A cross-sectional design was used. The participants were recruited from two community  
3 health centers of Xianning City of Hubei Province in China from June to October 2019. Both  
4 community health centers provided primary health care services for older people in urban and  
5 rural communities.

## 6 **Data collection and ethical considerations**

7 Ethical Approval was obtained from the Medical Ethics Committee of Huazhong University  
8 and Science and Technology (No. 2019–S941) prior to data collection. The researcher  
9 contacted the directors of two community health centers and explained the aims of this study.  
10 After permission was granted, the public health nurses and physicians were invited to assist  
11 with data collection. Health center staff helped to recruit participants by phone, informing the  
12 eligible diabetic older adults of the study purpose. Eligible individuals were then invited to  
13 the community health centers to complete the survey if they consented to participate. As  
14 another means of recruitment, when older adults with type 2 diabetes went to the community  
15 health centers for a physical check-up, follow-up blood glucose monitoring, or health  
16 education, they were also invited to participate in this study, if eligible. Once the written  
17 informed consent was obtained from each participant, the survey was administered by trained  
18 investigators. The information in this survey was obtained from the participants' self-  
19 reporting, anthropometric measurements, and laboratory test results, which were  
20 supplemented by the community health files.

## 21 **Participants**

1 Older adults with type 2 diabetes were identified from the electronic files of the two  
2 community health centers. The inclusion criteria of this study were as follows: (1) at least 65  
3 years old and living in the community; (2) diagnosed with type 2 diabetes, as confirmed by a  
4 physician based on the World Health Organization diagnostic criteria, 1999; (3) received  
5 their diagnosis at least 6 months prior to joining the study. The diabetic older adults were  
6 excluded if they: (1) could not walk independently; (2) had severe vision and hearing  
7 problems; (3) were unable to communicate with the investigators; (4) had dementia or mental  
8 health disorders; and (5) had acute diabetic complications.

9 The sample size was calculated using the formula for cross-sectional studies,<sup>19</sup>  $n =$   
10  $\frac{Z^2 P(1 - P)}{d^2}$ . Where n is the sample size, Z is the statistic corresponding to level of confidence,  
11 P is expected prevalence, and d is precision. We assumed a confidence level of 95.0%,  
12 expected frailty prevalence of 20.0% for community-dwelling older adults with type 2  
13 diabetes (determined by the pre-survey), and precision of 5.0%, indicating that at least 246  
14 participants were needed for this study.

### 15 **Survey instrument**

16 The personal information questionnaire was used to collect the participants' characteristics.  
17 The sociodemographic characteristics included age, gender, living place, education level,  
18 marital status, living status, working status, personal monthly income, and medical insurance;  
19 the lifestyle and clinical characteristics included smoking, alcohol drinking, sleep duration at  
20 night, self-rated quality of sleep, duration of diabetes, number of comorbidities,  
21 polypharmacy, body mass index (BMI), waist circumference, and HbA1c. Smoking status  
22 was categorized as current smoker (having smoked at least one cigarette per day), ex-smoker

1 (having stopped smoking at least one year before the survey) and non-smoker (having never  
2 smoked in one's lifetime). Alcohol drinking status was categorized into current drinker  
3 (someone who reported consuming alcohol currently), ex-drinker (someone who had quit  
4 drinking at least one year prior to the survey), and non-drinker (someone who reported never  
5 consuming alcohol). Polypharmacy was defined as concurrent use of 5 or more drugs. BMI  
6 was calculated by weight (kg)/ [height (m)]<sup>2</sup> and classified as underweight, normal,  
7 overweight, and obese (< 18.5, 18.5-23.9, 24.0-27.9, and ≥ 28.0 kg/m<sup>2</sup>), and high waist  
8 circumference was defined as ≥ 85 cm in men and ≥ 80 cm in women.<sup>20</sup>

9 Frailty was measured using the modified frailty phenotype criteria, which was based  
10 on the phenotypic criteria proposed by Fried *et al.*<sup>21</sup> The criteria included five components:  
11 (1) Unintentional weight loss: weight loss ≥ 4.5kg in the past year, not due to dieting and  
12 exercise; (2) Exhaustion: It was identified based on a response of “3-4 days or most of the  
13 time” during the week to either of the two questions: “I felt that everything I did was an  
14 effort” and “I could not get going”; (3) Slowness: average walking speed was tested by  
15 asking the participants to walk 6 meters at their usual pace, at total of two times. Slowness  
16 was identified by walking speed for men (≤ 0.89m/s) and women (≤ 0.79m/s)<sup>22</sup>; (4)  
17 Weakness: grip strength was measured with a dynamometer three times on each hand, and  
18 the maximum of the readings was used. Weakness was judged by grip strength for men (≤  
19 28kg) and women (≤ 18kg)<sup>22</sup>; and (5) Low physical activity: the Chinese version of Physical  
20 Activity Scale for the Elderly (PASE)<sup>23</sup> was used to assess participants' physical activity  
21 level in the past week. Low physical activity was classified by PASE score for men (≤ 56.4)  
22 and women (≤ 58.8).<sup>22</sup> One point was assigned for the presence of each component, and the

1 summed score was used to classify participants as robust (score = 0), pre-frail (score = 1-2)  
2 and frail (score = 3-5).

3 Mini-Nutritional Assessment (MNA) was used to assess the nutritional status of older  
4 adults.<sup>24</sup> It consists of 18 items grouped into four parts: anthropometric assessment, general  
5 assessment, dietary assessment, and self-assessment. The total score ranges from 0 to 30 and  
6 is used to classify the elderly as well-nourished ( $\geq 24$ ), at risk of malnutrition (17–23.5), or  
7 malnourished ( $< 17$ ). The Chinese version of MNA has been proven to be reliable and valid  
8 in the community-dwelling older population.<sup>25</sup>

9 Geriatric Depression Scale-15 (GDS-15) was used to evaluate the depressive  
10 symptoms of older adults.<sup>26</sup> The scale contains 15 items that require the subjects to answer  
11 with “yes” or “no”. The maximum score of the scale is 15, and a higher score indicates more  
12 severe depressive symptoms. The Chinese version of GDS-15 is a reliable and valid  
13 screening tool for assessing geriatric depressive symptoms in the Chinese population.<sup>27</sup>

14 The Chinese version of Summary of Diabetes Self-Care Activities (SDSCA)<sup>28</sup> was  
15 used to measure self-care behaviors of the older adults with type 2 diabetes; this instrument  
16 was modified from the original SDSCA.<sup>17</sup> It is a brief self-report questionnaire that includes  
17 11 items assessing the following aspects: general diet, specific diet, exercise, blood-glucose  
18 testing, foot care, and medication care in the past week. The total score of this scale ranges  
19 from 0 to 77, and a higher score indicates better diabetes self-care behaviors. It showed good  
20 validity and test-retest reliability in Chinese patients with type 2 diabetes.<sup>28</sup>

21 Anthropometric measurements, including height or knee height, weight, mid-arm  
22 circumference, calf circumference, and waist circumference, were measured by the trained

1  
2  
3  
4 1 investigators according to the measurement manual. Knee height was measured and  
5  
6  
7 2 converted to the estimated height using specific equations<sup>29</sup> for the older adults with severe  
8  
9 3 spinal curvature. All the HbA1c measures were obtained after the participants were recruited  
10  
11  
12 4 into the study. The blood collection and HbA1c measurements were administered by the  
13  
14  
15 5 community health center laboratories when the participants came to the centers for this  
16  
17  
18 6 survey.

### 7 **Data analysis**

8 The SPSS version 21.0 (SPSS Inc., Chicago, IL, USA) was used for data analysis. Frailty was  
9 defined as the dependent variable with 1= robust (0 on the frailty phenotype criteria), 2 = pre-  
10 frail (1-2), 3 = frail ( $\geq 3$ ). Sociodemographic, lifestyle and clinical characteristics,  
11 malnutrition, depressive symptoms, and diabetes self-care behaviors were considered  
12 potential factors for frailty. Raw data were evaluated for normality and multi-collinearity  
13 before data analysis. Data were described as n (%) for categorical variables and median  
14 (interquartile range [IQR]) or mean  $\pm$  SD for continuous variables. To test the statistical  
15 difference among groups, univariate analyses were conducted using chi-square test for  
16 categorical variables and Kruskal-Wallis H test for continuous variables. Variables that  
17 showed statistical significance of  $P < 0.1$  in the univariate analyses were included in the  
18 multinomial logistic regression, which estimated the prevalence odds ratio (OR) for pre-frail  
19 relative to robust and for frail relative to robust. The statistical significance was set at  $P <$   
20 0.05 for the logistic regression.

### 21 **Patient and public involvement**



1 Patients were not involved in the development of research question or the design of the study.  
2 Anthropometric measurements and HbA1c test results were provided to the participants,  
3 community physicians and nurses.

## 4 **RESULTS**

5 As shown in figure 1, a total of 302 eligible older adults consented to participate in this study.  
6 Eleven participants did not complete the questionnaires due to temporary issues and limited  
7 time, so the final sample consisted of 291 participants. Among these participants, 85 (29.2%)  
8 were robust, 150 (51.5%) were pre-frail, and 56 (19.2%) were frail.

### 9 **Characteristics of the participants**

10 The median age of participants was 69 years (IQR 67-72), with a range from 65 to 85 years.  
11 Among the participants, 154 (52.9%) were female. The majority of the participants were  
12 living in urban areas (84.5%), had junior high school or higher education (63.9%), had a  
13 spouse (80.1%), lived with others (86.9%), were currently not working (92.1%), had a  
14 personal monthly income below 3000 yuan (66.3%), and had urban employees' insurance  
15 (58.1%) (table 1).

16 Regarding the lifestyle characteristics, most of the participants were non-smokers  
17 (63.6%), non-drinkers (57.4%), with 5-8 h sleep duration at night per day (66.0%), and had  
18 good/very good sleep quality (61.2%) (table 2). Considering clinical characteristics, the  
19 median duration of diabetes was 10 years (IQR 4-16), and the median number of  
20 comorbidities was 5 (IQR 3-6). Among all participants, 29.6% had polypharmacy, 43.6% had  
21 normal BMI, and 17.5% had a normal waist circumference. The median score of HbA1c was  
22 6.66% (IQR 5.87-7.47) (table 2).

---

## 1 **Malnutrition, depressive symptoms, and diabetes self-care behaviors**

2 Of all participants, 96 (33.0%) were at risk of malnutrition, 6 (2.1%) were malnourished, and  
3 189 (64.9%) were nourished. The median score of depressive symptoms was 3 (IQR 1-5).  
4 The total score for diabetes self-care behaviors ranged from 12 to 70, with an average of  
5  $40.25 \pm 10.08$ . Among the 6 sub-dimensions of diabetes self-care behaviors, the two  
6 dimensions with the lowest level were blood-glucose testing (0 [0-2]) and foot care (0 [0-7])  
7 (table 3).

## 8 **Univariate analyses for influencing factors of frailty**

9 Univariate analyses were conducted to explore the associated factors for frailty according to  
10 the criterion of inclusion ( $p < 0.10$ ). Significant sociodemographic differences among groups  
11 were found for education level ( $p = 0.077$ ), personal monthly income ( $p = 0.026$ ), and  
12 medical insurance ( $p = 0.034$ ) (table 1). Regarding the lifestyle and clinical characteristics,  
13 significant group differences included alcohol drinking ( $p = 0.004$ ), sleep duration at night ( $p$   
14  $= 0.046$ ), self-rated sleep quality ( $p = 0.065$ ), duration of diabetes ( $p = 0.036$ ), comorbidities  
15 ( $p = 0.030$ ), polypharmacy ( $p = 0.025$ ), and HbA1c ( $p = 0.055$ ) (table 2). As shown in table 3,  
16 significant group differences were noted for malnutrition risk/malnutrition ( $p < 0.001$ ),  
17 depressive symptoms ( $p < 0.001$ ), exercise ( $p < 0.001$ ), foot care ( $p = 0.007$ ), and medication  
18 care ( $p = 0.060$ ).

## 19 **Predictors of frailty**

20 The predictors of pre-frailty for older adults with type 2 diabetes in this study included  
21 alcohol drinking (ex-drinker) ( $p = 0.017$ ), malnutrition risk/malnutrition ( $p = 0.026$ ),  
22 depressive symptoms ( $p = 0.003$ ), and exercise ( $p = 0.008$ ) (table 4). The following predictors

1 were found for the condition of frailty: alcohol drinking (ex-drinker) ( $p = 0.039$ ), HbA1c ( $p =$   
2  $0.026$ ), malnutrition risk/malnutrition ( $p = 0.001$ ), depressive symptoms ( $p = 0.001$ ), and  
3 exercise ( $p < 0.001$ ) (table 4).

#### 4 **DISCUSSION**

5 In this study, we assessed frailty status and its associated factors among Chinese community-  
6 dwelling older adults with type 2 diabetes. We found the prevalence of pre-frailty and frailty  
7 were 51.5% and 19.2%, respectively. Our result was comparable with the Beijing study (the  
8 prevalence of frailty was 19.32%),<sup>5</sup> however, the Beijing study applied the accumulation of  
9 deficits method (Frailty Index  $\geq 0.25$ ) to measure frailty among diabetic people aged  $\geq 55$   
10 years. By using the Fried frailty phenotype for assessing frailty, the prevalence of frailty in  
11 people with diabetes aged 65 and older was 25.0%-32.0%, as reported in the American  
12 studies.<sup>21 30</sup> In addition, studies conducted in Singapore and Spain showed lower frailty  
13 prevalence of 8.2% and 11.2%, respectively,<sup>6 10</sup> but, these two studies also recruited younger  
14 diabetic adults (i.e. younger than 65 years). The explanation for the wide variation in the  
15 prevalence of frailty in community-dwelling diabetic elderly populations is probably related  
16 to frailty instrument differences, sample difference, and socioeconomic differences among  
17 the studies.

18 Alcohol drinking was one predictor of frailty and pre-frailty among the diabetic older  
19 adults, and the frailty risk was significantly higher among ex-drinkers compared with non-  
20 drinkers. This association could be explained by the “sick quitter” effect. The diabetic older  
21 adults in poor health may reduce alcohol consumption or quit drinking, so the ex-drinker  
22 group may contain people with previous alcoholism or with a poor health condition.<sup>31</sup> In our

1 study, it is interesting that current drinking status showed a protective effect (OR = 0.266, p =  
2 0.055) on frailty compared with non-drinkers, although this factor didn't satisfy the statistical  
3 significance in the logistic regression. Previous studies indicated alcohol use (especially  
4 moderate drinking) had a negative association with physical frailty.<sup>32-34</sup> Moreover, a recent  
5 study demonstrated moderate alcohol consumption may protect against frailty through an  
6 anti-inflammatory mechanism, which indicated that C-reactive protein level partially  
7 mediated the relationship between moderate alcohol use and physical frailty.<sup>35</sup>

8       Elevated HbA1c was associated with an increased risk of frailty among community-  
9 dwelling diabetic older adults, which was consistent with the previous study in diabetic older  
10 people.<sup>6</sup> Hyperglycemia could contribute to physical frailty through several potential  
11 mechanisms, such as increasing microvascular damage<sup>36</sup> or causing skeletal muscle  
12 mitochondrial dysfunction.<sup>37</sup> In contrast, Yanagita *et al*<sup>11</sup> reported low level of HbA1c was  
13 associated with frailty measured by the Clinical Frailty Scale (CFS) among diabetic older  
14 adults. Zaslavsky *et al*<sup>38</sup> found a U-shaped relationship between glucose levels and physical  
15 frailty in older adults with diabetes, with the lowest risk of frailty at HbA1c levels of 7.6%.  
16 Overall, poor glucose control with hyperglycemia or hypoglycemia may increase the risk of  
17 frailty. Therefore, optimal glycemetic control needs to be individually determined for older  
18 adults with type 2 diabetes.<sup>39</sup> The global guideline for managing type 2 diabetes in older  
19 adults recommended that a HbA1c target up to 8.5% may be appropriate for frail diabetic  
20 elderly persons with functional dependency.<sup>40</sup> Recently, an international position statement  
21 on the management of frailty in diabetes mellitus patients recommended a HbA1c target

1 range of 7.0%-8.0% for mild to moderate frail diabetic older adults, and 7.5%-8.5% for those  
2 with severe frailty.<sup>41</sup>

3 Malnutrition led to pre-frailty and frailty among community-dwelling older adults  
4 with type 2 diabetes, which was comparable with the findings of a Spanish study.<sup>12</sup> In the  
5 current study, 35.1% of our participants were at risk for malnutrition or were malnourished,  
6 and 52.6% of them were overweight or obese. However, 39 (38.2%) of the participants who  
7 had malnutrition risk or were malnourished in this study were classified as either overweight  
8 or obese. This result suggests that the diabetic elderly can suffer from malnutrition status  
9 even if they are overweight or obese. Malnutrition is prevalent in diabetic older adults<sup>42 43</sup> due  
10 to various reasons, such as ageing-related appetite reductions, swallowing difficulties, limited  
11 mobility, and overly dietary restrictions.<sup>44</sup> We found that 45.4% of the diabetic older adults  
12 scored 0 points on the item of protein intake in this study, indicating that those people might  
13 have insufficient protein intake. Although malnutrition and physical frailty share some  
14 common screening items and physiology, they are not interchangeable syndromes, and  
15 community-dwelling diabetic older people with malnutrition were more prone to be  
16 physically frail. Screening the nutritional status of diabetic older adults and providing them  
17 with appropriate dietary instructions would be an effective method for preventing physical  
18 frailty within this population.

19 Consistent with previous studies among older populations,<sup>15 16</sup> this study highlighted  
20 the significant impact of depressive symptoms on pre-frailty and frailty among the diabetic  
21 elderly. Recent evidence showed a reciprocal interaction between depression and frailty in  
22 older adults.<sup>16</sup> Depression contributes to physical frailty due to the decrease in physical

1 activities or weight loss, and in turn, physical frailty may cause functional dependence or  
2 disability, thus leading to depression. Diabetes can contribute to depression, which is a  
3 common condition in people with type 2 diabetes, especially in the elderly.<sup>45 46</sup> Therefore,  
4 there is an urgent need for appropriate management of depressive symptoms in elderly  
5 diabetic adults in order to help slow the progression of physical frailty in this population.

6 We found exercise behavior was a protective factor for frailty among community-  
7 dwelling diabetic older adults. A higher score of exercise behavior was associated with a  
8 lower risk of pre-frailty and frailty. Exercise can help reduce frailty through mechanisms of  
9 decreasing muscle inflammation, promoting anabolism, and increasing muscle protein  
10 synthesis.<sup>47</sup> Education programs for exercise training have shown to be effective at improving  
11 frailty in the elderly.<sup>48</sup> Pariser *et al*<sup>49</sup> conducted a diabetes self-management education  
12 program comprised of ten weeks of aerobic and resistance exercise training, which  
13 effectively reduced HbA1c and frailty in diabetic older adults. In addition, the three different  
14 frailty groups (i.e. robust, pre-frail, and frail) differed significantly in terms of medication  
15 care and foot self-care behaviors in this study. The association between medication care  
16 behavior and frailty may be explained by the fact that adherence to medication is directly  
17 associated with the control of blood glucose, which has an impact on the progression of  
18 frailty. The association between foot self-care behavior and frailty could be explained by the  
19 observation that the participants with a higher score on foot care were more likely to be active  
20 in self-management for complications prevention and concerned about their own health,  
21 contributing to a reduced risk of frailty.

1 This study has several limitations. First, this study is a cross-sectional study, therefore  
2 the causal relationship of the associated factors with frailty could not be established. Second,  
3 information such as the older adults' physical activities and self-care behaviors were self-  
4 reported, so it may be subject to potential recall bias. Third, we excluded older adults who  
5 could not walk independently, as well as those with severe vision and hearing problems, so  
6 findings may not be generalizable to a more heterogeneous population. Fourth, the data  
7 collected from one city would likely not reflect the nation-wide prevalence of frailty. Fifth,  
8 information such as the amount of alcohol consumed weekly for current drinkers and the date  
9 of drinking cessation, as well as the amount of previous alcohol consumption for ex-drinkers  
10 was not collected in this study. Future studies on the relationship between alcohol  
11 consumption and frailty in this population are warranted. Finally, future studies should  
12 explore the effects of clinical and behavioral factors on frailty among community-dwelling  
13 diabetic older adults using a prospective longitudinal design and a larger sample size.

## 14 **CONCLUSIONS**

15 Older adults with type 2 diabetes are at a high risk of frailty in Chinese elderly populations.  
16 Being an ex-drinker, having a higher level of HbA1c, experiencing malnutrition  
17 risk/malnutrition, and suffering from depressive symptoms were risk factors of frailty among  
18 the community-dwelling diabetic older adults; exercise self-care behavior was found to be a  
19 protective factor for frailty. The findings of this study could help guide future studies to  
20 implement targeted and suitable interventions for preventing frailty among community-  
21 dwelling diabetic older adults.

---

## 1 **Acknowledgements**

2 The authors wish to thank the administrators, public health nurses, and physicians in the two  
3 community health centers for assisting with data collection. We also want to thank the  
4 community members for participating in this study.

## 6 **Author Contributions**

7 LK, JL and JM designed the study. LK, HZ and QW collected and managed the data. LK and  
8 JF completed the data analysis. LK and JL drafted the manuscript. JB checked and revised  
9 the manuscript. All the authors read and approved the final manuscript.

## 11 **Funding**

12 This study was supported by National Natural Science Foundation of China (No. 71503088).

## 14 **Competing interests**

15 None declared.

## 17 **Patient consent for publication**

18 Obtained.

## 20 **Ethics approval**

21 This study was approved by the Medical Ethics Committee of Huazhong University and  
22 Science and Technology (No. 2019–S941).



---

## 1 Data availability statement

2 Data are available from the first author upon reasonable request. All data relevant to this  
3 study are included in the article.

## 5 Figure 1. Flow chart of inclusion of participants.

## 7 REFERENCES

- 8 1. International Diabetes Federation. IDF diabetes atlas 9th edition. 2019. Available:  
9 <https://www.diabetesatlas.org>.
- 10 2. Wang L, Gao P, Zhang M, *et al*. Prevalence and Ethnic Pattern of Diabetes and Prediabetes  
11 in China in 2013. *Jama* 2017;317:2515-23.
- 12 3. Assar ME, Laosa O, Rodriguez Manas L. Diabetes and frailty. *Curr Opin Clin Nutr Metab*  
13 *Care* 2019;22:52-57.
- 14 4. Morley JE, Vellas B, van Kan GA, *et al*. Frailty consensus: a call to action. *J Am Med Dir*  
15 *Assoc* 2013;14:392-7.
- 16 5. Chhetri JK, Zheng Z, Xu X, *et al*. The prevalence and incidence of frailty in Pre-diabetic  
17 and diabetic community-dwelling older population: results from Beijing longitudinal  
18 study of aging II (BLSA-II). *BMC Geriatr* 2017;17:47.
- 19 6. Garcia-Esquinas E, Graciani A, Guallar-Castillon P, *et al*. Diabetes and risk of frailty and  
20 its potential mechanisms: a prospective cohort study of older adults. *J Am Med Dir*  
21 *Assoc* 2015;16:748-54.

- 1 7. Sinclair AJ, Abdelhafiz AH, Rodriguez-Manas L. Frailty and sarcopenia - newly emerging  
2 and high impact complications of diabetes. *J Diabetes Complications* 2017;31:1465-  
3 73.
- 4 8. Umegaki H. Sarcopenia and frailty in older patients with diabetes mellitus. *Geriatr*  
5 *Gerontol Int* 2016;16:293-9.
- 6 9. Chao CT, Wang J, Chien KL. Both pre-frailty and frailty increase healthcare utilization  
7 and adverse health outcomes in patients with type 2 diabetes mellitus. *Cardiovasc*  
8 *Diabetol* 2018;17:130.
- 9 10. Thein FS, Li Y, Nyunt MSZ, *et al.* Physical frailty and cognitive impairment is associated  
10 with diabetes and adversely impact functional status and mortality. *Postgrad Med*  
11 2018;130:561-67.
- 12 11. Yanagita I, Fujihara Y, Eda T, *et al.* Low glycated hemoglobin level is associated with  
13 severity of frailty in Japanese elderly diabetes patients. *J Diabetes Investig*  
14 2018;9:419-25.
- 15 12. Casals C, Casals Sanchez JL, Suarez Cadenas E, *et al.* [Frailty in older adults with type 2  
16 diabetes mellitus and its relation with glucemic control, lipid profile, blood pressure,  
17 balance, disability grade and nutritional status]. *Nutr Hosp* 2018;35:820-26.
- 18 13. Verlaan S, Ligthart-Melis GC, Wijers SLJ, *et al.* High Prevalence of Physical Frailty  
19 Among Community-Dwelling Malnourished Older Adults-A Systematic Review and  
20 Meta-Analysis. *J Am Med Dir Assoc* 2017;18:374-82.

- 
- 1 14. Wei K, Nyunt MSZ, Gao Q, *et al.* Frailty and Malnutrition: Related and Distinct  
2 Syndrome Prevalence and Association among Community-Dwelling Older Adults:  
3 Singapore Longitudinal Ageing Studies. *J Am Med Dir Assoc* 2017;18:1019-28.
- 4 15. Aprahamian I, Suemoto CK, Lin SM, *et al.* Depression is associated with self-rated frailty  
5 in older adults from an outpatient clinic: a prospective study. *Int Psychogeriatr*  
6 2019;31:425-34.
- 7 16. Soysal P, Veronese N, Thompson T, *et al.* Relationship between depression and frailty in  
8 older adults: A systematic review and meta-analysis. *Ageing Res Rev* 2017;36:78-87.
- 9 17. Toobert DJ, Hampson SE, Glasgow RE. The summary of diabetes self-care activities  
10 measure: results from 7 studies and a revised scale. *Diabetes Care* 2000;23:943-50.
- 11 18. Cai C, Jia WP. Community healthcare for diabetes in China (In Chinese). *Scientia*  
12 *Sinica(Vitae)* 2018;48:820-26.
- 13 19. Pourhoseingholi MA, Vahedi M, Rahimzadeh M. Sample size calculation in medical  
14 studies. *Gastroenterol Hepatol Bed Bench* 2013;6:14-7.
- 15 20. Zhou BF. Predictive values of body mass index and waist circumference for risk factors  
16 of certain related diseases in Chinese adults--study on optimal cut-off points of body  
17 mass index and waist circumference in Chinese adults. *Biomed Environ Sci*  
18 2002;15:83-96.
- 19 21. Fried LP, Tangen CM, Walston J, *et al.* Frailty in older adults: evidence for a phenotype.  
20 *J Gerontol A Biol Sci Med Sci* 2001;56:M146-56.

- 
- 1 22. Auyeung TW, Lee JS, Leung J, *et al.* The selection of a screening test for frailty  
2 identification in community-dwelling older adults. *J Nutr Health Aging* 2014;18:199-  
3 203.
- 4 23. Wu CY, Su TP, Fang CL, *et al.* Sleep quality among community-dwelling elderly people  
5 and its demographic, mental, and physical correlates. *J Chin Med Assoc* 2012;75:75-  
6 80.
- 7 24. Guigoz Y, Vellas B, Garry PJ. Assessing the nutritional status of the elderly: The Mini  
8 Nutritional Assessment as part of the geriatric evaluation. *Nutr Rev* 1996;54:S59-65.
- 9 25. Han Y, Li S, Zheng Y. Predictors of nutritional status among community-dwelling older  
10 adults in Wuhan, China. *Public Health Nutr* 2009;12:1189-96.
- 11 26. Sheikh JI, Yesavage JA. Geriatric Depression Scale (GDS): Recent evidence and  
12 development of a shorter version. *Clinical Gerontologist* 1986;5:165–73.
- 13 27. Lee H-cB, Chiu HFK, Kowk WY, *et al.* Chinese elderly and the GDS short form: A  
14 preliminary study. *Clinical Gerontologist* 1993;14:37–42.
- 15 28. Wan QQ, Shang SM, Lai XB, *et al.* Study on the reliability and validity of summary of  
16 diabetes self-care activities for type 2 diabetes patients (In Chinese). *Chin J Prac Nurs*  
17 2008;24:26-27.
- 18 29. Li ET, Tang EK, Wong CY, *et al.* Predicting stature from knee height in Chinese elderly  
19 subjects. *Asia Pac J Clin Nutr* 2000;9:252-5.
- 20 30. Ottenbacher KJ, Graham JE, Al Snih S, *et al.* Mexican Americans and frailty: findings  
21 from the Hispanic established populations epidemiologic studies of the elderly. *Am J*  
22 *Public Health* 2009;99:673-9.

- 1  
2  
3  
4 1 31. Kojima G, Liljas A, Iliffe S, *et al.* A systematic review and meta-analysis of prospective  
5  
6  
7 2 associations between alcohol consumption and incident frailty. *Age Ageing*  
8  
9 3 2018;47:26-34.  
10  
11  
12 4 32. Ortola R, Garcia-Esquinas E, Leon-Munoz LM, *et al.* Patterns of Alcohol Consumption  
13  
14 5 and Risk of Frailty in Community-dwelling Older Adults. *J Gerontol A Biol Sci Med*  
15  
16 6 *Sci* 2016;71:251-8.  
17  
18  
19 7 33. Shah M, Paulson D, Nguyen V. Alcohol Use and Frailty Risk among Older Adults over  
20  
21 8 12 Years: The Health and Retirement Study. *Clin Gerontol* 2018;41:315-25.  
22  
23  
24 9 34. Kojima G, Jivraj S, Iliffe S, *et al.* Alcohol Consumption and Risk of Incident Frailty: The  
25  
26 10 English Longitudinal Study of Aging. *J Am Med Dir Assoc* 2019;20:725-29.  
27  
28  
29 11 35. Shah M, Paulson D. C-reactive protein level partially mediates the relationship between  
30  
31 12 moderate alcohol use and frailty: the Health and Retirement Study. *Age Ageing*  
32  
33 13 2016;45:874-78.  
34  
35  
36 14 36. Sheetz MJ, King GL. Molecular understanding of hyperglycemia's adverse effects for  
37  
38 15 diabetic complications. *Jama* 2002;288:2579-88.  
39  
40  
41 16 37. Phielix E, Schrauwen-Hinderling VB, Mensink M, *et al.* Lower intrinsic ADP-stimulated  
42  
43 17 mitochondrial respiration underlies in vivo mitochondrial dysfunction in muscle of  
44  
45 18 male type 2 diabetic patients. *Diabetes* 2008;57:2943-9.  
46  
47  
48 19 38. Zaslavsky O, Walker RL, Crane PK, *et al.* Glucose Levels and Risk of Frailty. *J Gerontol*  
49  
50 20 *A Biol Sci Med Sci* 2016;71:1223-9.  
51  
52  
53 21 39. Mathur S, Zammitt NN, Frier BM. Optimal glycaemic control in elderly people with type  
54  
55 22 2 diabetes: what does the evidence say? *Drug Saf* 2015;38:17-32.  
56  
57  
58  
59  
60

- 
- 1  
2  
3  
4 1 40. International Diabetes Federation. Managing Older People with Type 2 Diabetes: Global  
5  
6  
7 2 Guideline. 2013. Available: [https://www.idf.org/e-library/guidelines/78-global-](https://www.idf.org/e-library/guidelines/78-global-guideline-for-managing-older-people-with-type-2-diabetes.html)  
8  
9 3 [guideline-for-managing-older-people-with-type-2-diabetes.html](https://www.idf.org/e-library/guidelines/78-global-guideline-for-managing-older-people-with-type-2-diabetes.html).  
10  
11  
12 4 41. Sinclair AJ, Abdelhafiz A, Dunning T, *et al*. An International Position Statement on the  
13  
14 5 Management of Frailty in Diabetes Mellitus: Summary of Recommendations 2017. *J*  
15  
16 6 *Frailty Aging* 2018;7:10-20.  
17  
18  
19 7 42. Liu GX, Chen Y, Yang YX, *et al*. Pilot study of the Mini Nutritional Assessment on  
20  
21 8 predicting outcomes in older adults with type 2 diabetes. *Geriatr Gerontol Int*  
22  
23 9 2017;17:2485-92.  
24  
25  
26 10 43. Vischer UM, Perrenoud L, Genet C, *et al*. The high prevalence of malnutrition in elderly  
27  
28 11 diabetic patients: implications for anti-diabetic drug treatments. *Diabet Med*  
29  
30 12 2010;27:918-24.  
31  
32  
33 13 44. McClinchy J. Dietary management of older people with diabetes. *Br J Community Nurs*  
34  
35 14 2018;23:248-51.  
36  
37  
38 15 45. Park M, Reynolds CF, 3rd. Depression among older adults with diabetes mellitus. *Clin*  
39  
40 16 *Geriatr Med* 2015;31:117-37, ix.  
41  
42  
43 17 46. Darwish L, Beroncal E, Sison MV, *et al*. Depression in people with type 2 diabetes:  
44  
45 18 current perspectives. *Diabetes Metab Syndr Obes* 2018;11:333-43.  
46  
47  
48 19 47. Aguirre LE, Villareal DT. Physical Exercise as Therapy for Frailty. *Nestle Nutr Inst*  
49  
50 20 *Workshop Ser* 2015;83:83-92.  
51  
52  
53  
54  
55  
56  
57  
58  
59  
60

---

1 48. de Labra C, Guimaraes-Pinheiro C, Maseda A, *et al.* Effects of physical exercise  
2 interventions in frail older adults: a systematic review of randomized controlled trials.  
3 *BMC Geriatr* 2015;15:154.

4 49. Pariser G, Hager K, Gillette P, *et al.* Active steps for diabetes: a community-campus  
5 partnership addressing frailty and diabetes. *Diabetes Educ* 2014;40:60-7.

For peer review only

1 **Table 1** Sociodemographic characteristics of the participants by different frailty statuses

| Variables                                  | Total<br>(n=291)<br>N (%) | Robust<br>(n=85)<br>N (%) | Pre-frail<br>(n=150)<br>N (%) | Frail<br>(n=56)<br>N (%) | P value      |
|--------------------------------------------|---------------------------|---------------------------|-------------------------------|--------------------------|--------------|
| Age (years)                                |                           |                           |                               |                          | 0.295        |
| 65-69                                      | 154 (52.9)                | 52 (61.2)                 | 74 (49.3)                     | 28 (50.0)                |              |
| 70-74                                      | 91 (31.3)                 | 25 (29.4)                 | 49 (32.7)                     | 17 (30.4)                |              |
| ≥75                                        | 46 (15.8)                 | 8 (9.4)                   | 27 (18.0)                     | 11 (19.6)                |              |
| Gender                                     |                           |                           |                               |                          | 0.270        |
| Male                                       | 137 (47.1)                | 41 (48.2)                 | 75 (50.0)                     | 21 (37.5)                |              |
| Female                                     | 154 (52.9)                | 44 (51.8)                 | 75 (50.0)                     | 35 (62.5)                |              |
| Living place                               |                           |                           |                               |                          | 0.434        |
| Urban                                      | 246 (84.5)                | 75 (88.2)                 | 126 (84.0)                    | 45 (80.4)                |              |
| Rural                                      | 45 (15.5)                 | 10 (11.8)                 | 24 (16.0)                     | 11 (19.6)                |              |
| Education level                            |                           |                           |                               |                          | <b>0.077</b> |
| Illiterate                                 | 42 (14.4)                 | 8 (9.4)                   | 18 (12.0)                     | 16 (28.6)                |              |
| Elementary school                          | 63 (21.6)                 | 18 (21.2)                 | 34 (22.7)                     | 11 (19.6)                |              |
| Junior high school                         | 95 (32.6)                 | 27 (31.8)                 | 50 (33.3)                     | 18 (32.1)                |              |
| Senior high school                         | 55 (18.9)                 | 19 (22.4)                 | 28 (18.7)                     | 8 (14.3)                 |              |
| College or over                            | 36 (12.4)                 | 13 (15.3)                 | 20 (13.3)                     | 3 (5.4)                  |              |
| Marital status                             |                           |                           |                               |                          | 0.658        |
| Spouse                                     | 233 (80.1)                | 66 (77.6)                 | 120 (80.0)                    | 47 (83.9)                |              |
| No spouse                                  | 58 (19.9)                 | 19 (22.4)                 | 30 (20.0)                     | 9 (16.1)                 |              |
| Living status                              |                           |                           |                               |                          | 0.279        |
| Living with others                         | 253 (86.9)                | 71 (83.5)                 | 135 (90.0)                    | 47 (83.9)                |              |
| Living alone                               | 38 (13.1)                 | 14 (16.5)                 | 15 (10.0)                     | 9 (16.1)                 |              |
| Currently working                          |                           |                           |                               |                          | 0.197        |
| Yes                                        | 23 (7.9)                  | 10 (11.8)                 | 11 (7.3)                      | 2 (3.6)                  |              |
| No                                         | 268 (92.1)                | 75 (88.2)                 | 139 (92.7)                    | 54 (96.4)                |              |
| Personal monthly income<br>(Chinese Yuan)  |                           |                           |                               |                          | <b>0.026</b> |
| <1000                                      | 43 (14.8)                 | 7 (8.2)                   | 20 (13.3)                     | 16 (28.6)                |              |
| 1000-1999                                  | 50 (17.2)                 | 14 (16.5)                 | 27 (18.0)                     | 9 (16.1)                 |              |
| 2000-2999                                  | 100 (34.4)                | 34 (40.0)                 | 47 (31.3)                     | 19 (33.9)                |              |
| ≥3000                                      | 98 (33.7)                 | 30 (35.3)                 | 56 (37.3)                     | 12 (21.4)                |              |
| Medical insurance                          |                           |                           |                               |                          | <b>0.034</b> |
| Urban residential<br>insurance             | 79 (27.1)                 | 17 (20.0)                 | 42 (28.0)                     | 20 (35.7)                |              |
| Urban employees'<br>insurance              | 169 (58.1)                | 56 (65.9)                 | 90 (60.0)                     | 23 (41.1)                |              |
| New rural cooperative<br>medical insurance | 43 (14.8)                 | 12 (14.1)                 | 18 (12.0)                     | 13 (23.2)                |              |

2



**Table 2** Lifestyle and clinical characteristics of the participants by different frailty statuses

| Variables                       | Total<br>(n=291) | Robust<br>(n=85) | Pre-frail<br>(n=150) | Frail<br>(n=56)  | P value      |
|---------------------------------|------------------|------------------|----------------------|------------------|--------------|
| N (%) / Median (IQR)            |                  |                  |                      |                  |              |
| Smoking                         |                  |                  |                      |                  | 0.612        |
| Non-smoker                      | 185 (63.6)       | 54 (63.5)        | 93 (62.0)            | 38 (67.9)        |              |
| Ex-smoker                       | 69 (23.7)        | 17 (20.0)        | 39 (26.0)            | 13 (23.2)        |              |
| Current smoker                  | 37 (12.7)        | 14 (16.5)        | 18 (12.0)            | 5 (8.9)          |              |
| Alcohol Drinking                |                  |                  |                      |                  | <b>0.004</b> |
| Non-drinker                     | 167 (57.4)       | 50 (58.8)        | 76 (50.7)            | 41 (73.2)        |              |
| Ex-drinker                      | 46 (15.8)        | 7 (8.2)          | 30 (20.0)            | 9 (16.1)         |              |
| Current drinker                 | 78 (26.8)        | 28 (32.9)        | 44 (29.3)            | 6 (10.7)         |              |
| Sleep duration at night (hours) |                  |                  |                      |                  | <b>0.046</b> |
| <5                              | 75 (25.8)        | 14 (16.5)        | 39 (26.0)            | 22 (39.3)        |              |
| 5-8                             | 192 (66.0)       | 64 (75.3)        | 99 (66.0)            | 29 (51.8)        |              |
| >8                              | 24 (8.2)         | 7 (8.2)          | 12 (8.0)             | 5 (8.9)          |              |
| Self-rated sleep quality        |                  |                  |                      |                  | <b>0.065</b> |
| Very good                       | 33 (11.3)        | 14 (16.5)        | 17 (11.3)            | 2 (3.6)          |              |
| Good                            | 145 (49.8)       | 44 (51.8)        | 77 (51.3)            | 24 (42.9)        |              |
| Bad                             | 89 (30.6)        | 24 (28.2)        | 42 (28.0)            | 23 (41.1)        |              |
| Very bad                        | 24 (8.2)         | 3 (3.5)          | 14 (9.3)             | 7 (12.5)         |              |
| Duration of diabetes (years)    | 10 (4-16)        | 9 (4-16)         | 11 (5-16)            | 7 (4-13)         | <b>0.036</b> |
| Number of comorbidities         | 5 (3-6)          | 4 (3-6)          | 5 (3-6)              | 5 (4-7)          | <b>0.030</b> |
| Polypharmacy                    |                  |                  |                      |                  | <b>0.025</b> |
| No                              | 205 (70.4)       | 68 (80.0)        | 104 (69.3)           | 33 (58.9)        |              |
| Yes                             | 86 (29.6)        | 17 (20.0)        | 46 (30.7)            | 23 (41.1)        |              |
| BMI (kg/m <sup>2</sup> )        |                  |                  |                      |                  | 0.321        |
| <18.5                           | 11 (3.8)         | 0 (0)            | 8 (5.3)              | 3 (5.4)          |              |
| 18.5-23.9                       | 127 (43.6)       | 37 (43.5)        | 65 (43.3)            | 25 (44.6)        |              |
| 24-27.9                         | 114 (39.2)       | 38 (44.7)        | 58 (38.7)            | 18 (32.1)        |              |
| ≥28                             | 39 (13.4)        | 10 (11.8)        | 19 (12.7)            | 10 (17.9)        |              |
| Waist circumference             |                  |                  |                      |                  | 0.285        |
| Normal                          | 51 (17.5)        | 11 (12.9)        | 27 (18.0)            | 13 (23.2)        |              |
| High                            | 240 (82.5)       | 74 (87.1)        | 123 (82.0)           | 43 (76.8)        |              |
| HbA1c (%)                       | 6.66 (5.87-7.47) | 6.74 (5.96-7.20) | 6.48 (5.72-7.26)     | 6.97 (5.95-8.42) | <b>0.055</b> |

IQR, interquartile range; BMI, body mass index; HbA1c, glycated hemoglobin.

**Table 3** Malnutrition, depressive symptoms and diabetes self-care behaviors of the participants by different frailty statuses

| Variables                      | Possible range | Actual range | Total (n=291) | Robust (n=85) | Pre-frail (n=150) | Frail (n=56) | P value          |
|--------------------------------|----------------|--------------|---------------|---------------|-------------------|--------------|------------------|
| N (%) / Median (IQR)           |                |              |               |               |                   |              |                  |
| Malnutrition risk/malnutrition |                |              |               |               |                   |              | <b>&lt;0.001</b> |
| No                             |                |              | 189 (64.9)    | 76 (89.4)     | 96 (64.0)         | 17 (30.4)    |                  |
| Yes                            |                |              | 102 (35.1)    | 9 (10.6)      | 54 (36.0)         | 39 (69.6)    |                  |
| GDS-15 score                   | 0-15           | 0-15         | 3 (1-5)       | 1 (0-3)       | 3 (1-5)           | 5 (4-8)      | <b>&lt;0.001</b> |
| SDSCA score                    |                |              |               |               |                   |              |                  |
| General diet score             | 0-14           | 0-14         | 14 (10-14)    | 14 (10-14)    | 14 (10-14)        | 14 (10-14)   | 0.465            |
| Specific diet score            | 0-14           | 0-14         | 8 (7-12)      | 10 (7-13)     | 7 (7-12)          | 7 (7-12)     | 0.131            |
| Exercise score                 | 0-14           | 0-14         | 7 (7-14)      | 14 (7-14)     | 7 (7-14)          | 7 (0-7)      | <b>&lt;0.001</b> |
| Blood-glucose testing score    | 0-14           | 0-14         | 0 (0-2)       | 0 (0-2)       | 0 (0-2)           | 0 (0-1)      | 0.183            |
| Foot care score                | 0-14           | 0-14         | 0 (0-7)       | 0 (0-7)       | 0 (0-7)           | 0 (0-0)      | <b>0.007</b>     |
| Medication care score          | 0-7            | 0-7          | 7 (7-7)       | 7 (7-7)       | 7 (7-7)           | 7 (7-7)      | <b>0.060</b>     |

IQR, interquartile range; GDS-15, Geriatric Depression Scale-15; SDSCA, Summary of Diabetes Self-Care Activities.

**Table 4** Logistic regression model of predictors for pre-frailty and frailty

|                                | Pre-frail |                 |              | Frail |                 |                  |
|--------------------------------|-----------|-----------------|--------------|-------|-----------------|------------------|
|                                | OR        | 95% CI          | P value      | OR    | 95% CI          | P value          |
| Alcohol Drinking               |           |                 |              |       |                 |                  |
| Ex-drinker                     | 3.664     | 1.260 to 10.653 | <b>0.017</b> | 4.461 | 1.079 to 18.438 | <b>0.039</b>     |
| Current drinker                | 1.416     | 0.680 to 2.950  | 0.353        | 0.266 | 0.069 to 1.026  | 0.055            |
| Non-drinker                    | 1         | -               | -            | 1     | -               | -                |
| HbA1c                          | 0.830     | 0.644 to 1.071  | 0.152        | 1.434 | 1.045 to 1.968  | <b>0.026</b>     |
| Malnutrition risk/Malnutrition |           |                 |              |       |                 |                  |
| Yes                            | 2.806     | 1.133 to 6.950  | <b>0.026</b> | 8.062 | 2.470 to 26.317 | <b>0.001</b>     |
| No                             | 1         | -               | -            | 1     | -               | -                |
| GDS-15 score                   | 1.285     | 1.087 to 1.520  | <b>0.003</b> | 1.438 | 1.166 to 1.773  | <b>0.001</b>     |
| Exercise score                 | 0.906     | 0.843 to 0.974  | <b>0.008</b> | 0.796 | 0.716 to 0.884  | <b>&lt;0.001</b> |

GDS-15, Geriatric Depression Scale-15.

1  
2  
3  
4  
5  
6  
7  
8  
9  
10  
11  
12  
13  
14  
15  
16  
17  
18  
19  
20  
21  
22  
23  
24  
25  
26  
27  
28  
29  
30  
31  
32  
33  
34  
35  
36  
37  
38  
39  
40  
41  
42  
43  
44  
45  
46  
47  
48  
49  
50  
51  
52  
53  
54  
55  
56  
57  
58  
59  
60

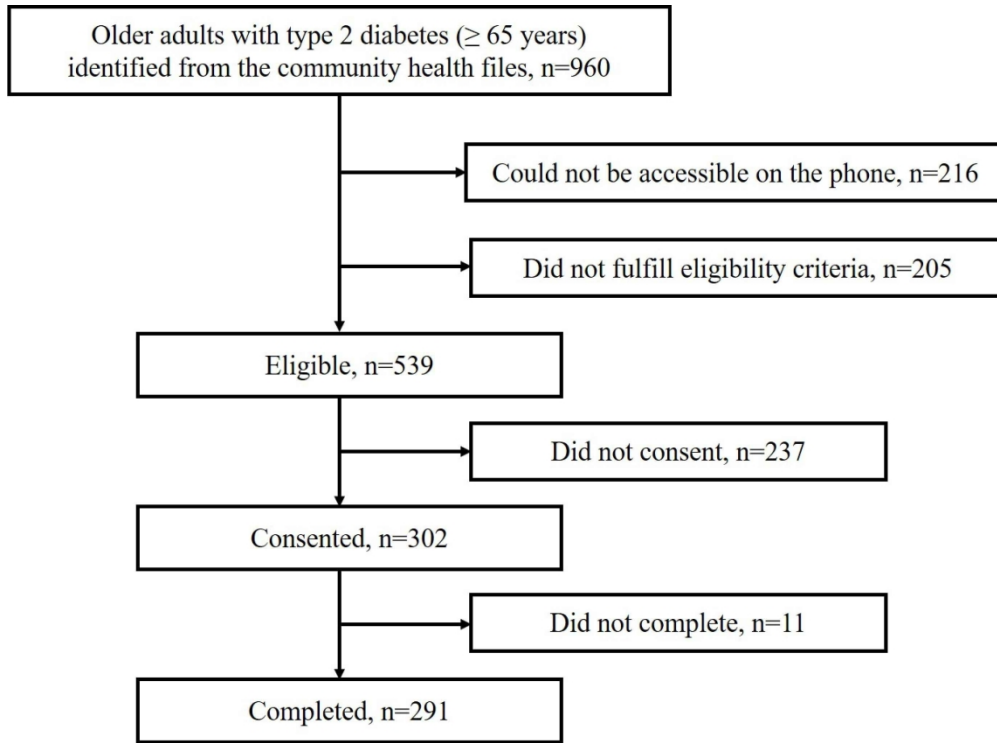

Flow chart of inclusion of participants

234x173mm (300 x 300 DPI)

**STROBE 2007 (v4) Statement—Checklist of items that should be included in reports of *cross-sectional studies***

| Section/Topic                | Item # | Recommendation                                                                                                                                                                       | Reported on page # |
|------------------------------|--------|--------------------------------------------------------------------------------------------------------------------------------------------------------------------------------------|--------------------|
| <b>Title and abstract</b>    | 1      | (a) Indicate the study's design with a commonly used term in the title or the abstract                                                                                               | 1-2                |
|                              |        | (b) Provide in the abstract an informative and balanced summary of what was done and what was found                                                                                  | 2                  |
| <b>Introduction</b>          |        |                                                                                                                                                                                      |                    |
| Background/rationale         | 2      | Explain the scientific background and rationale for the investigation being reported                                                                                                 | 4-5                |
| Objectives                   | 3      | State specific objectives, including any prespecified hypotheses                                                                                                                     | 5                  |
| <b>Methods</b>               |        |                                                                                                                                                                                      |                    |
| Study design                 | 4      | Present key elements of study design early in the paper                                                                                                                              | 6                  |
| Setting                      | 5      | Describe the setting, locations, and relevant dates, including periods of recruitment, exposure, follow-up, and data collection                                                      | 6                  |
| Participants                 | 6      | (a) Give the eligibility criteria, and the sources and methods of selection of participants                                                                                          | 7                  |
| Variables                    | 7      | Clearly define all outcomes, exposures, predictors, potential confounders, and effect modifiers. Give diagnostic criteria, if applicable                                             | 10                 |
| Data sources/<br>measurement | 8*     | For each variable of interest, give sources of data and details of methods of assessment (measurement). Describe comparability of assessment methods if there is more than one group | 7-10               |
| Bias                         | 9      | Describe any efforts to address potential sources of bias                                                                                                                            | 9-10               |
| Study size                   | 10     | Explain how the study size was arrived at                                                                                                                                            | 7                  |
| Quantitative variables       | 11     | Explain how quantitative variables were handled in the analyses. If applicable, describe which groupings were chosen and why                                                         | 10                 |
| Statistical methods          | 12     | (a) Describe all statistical methods, including those used to control for confounding                                                                                                | 10                 |
|                              |        | (b) Describe any methods used to examine subgroups and interactions                                                                                                                  |                    |
|                              |        | (c) Explain how missing data were addressed                                                                                                                                          |                    |
|                              |        | (d) If applicable, describe analytical methods taking account of sampling strategy                                                                                                   |                    |
|                              |        | (e) Describe any sensitivity analyses                                                                                                                                                |                    |
| <b>Results</b>               |        |                                                                                                                                                                                      |                    |

|                          |     |                                                                                                                                                                                                              |       |
|--------------------------|-----|--------------------------------------------------------------------------------------------------------------------------------------------------------------------------------------------------------------|-------|
| Participants             | 13* | (a) Report numbers of individuals at each stage of study—eg numbers potentially eligible, examined for eligibility, confirmed eligible, included in the study, completing follow-up, and analysed            | 11    |
|                          |     | (b) Give reasons for non-participation at each stage                                                                                                                                                         | 11    |
|                          |     | (c) Consider use of a flow diagram                                                                                                                                                                           | 11    |
| Descriptive data         | 14* | (a) Give characteristics of study participants (eg demographic, clinical, social) and information on exposures and potential confounders                                                                     | 11-12 |
|                          |     | (b) Indicate number of participants with missing data for each variable of interest                                                                                                                          |       |
| Outcome data             | 15* | Report numbers of outcome events or summary measures                                                                                                                                                         | 11    |
| Main results             | 16  | (a) Give unadjusted estimates and, if applicable, confounder-adjusted estimates and their precision (eg, 95% confidence interval). Make clear which confounders were adjusted for and why they were included | 12-13 |
|                          |     | (b) Report category boundaries when continuous variables were categorized                                                                                                                                    | 26-27 |
|                          |     | (c) If relevant, consider translating estimates of relative risk into absolute risk for a meaningful time period                                                                                             |       |
| Other analyses           | 17  | Report other analyses done—eg analyses of subgroups and interactions, and sensitivity analyses                                                                                                               |       |
| <b>Discussion</b>        |     |                                                                                                                                                                                                              |       |
| Key results              | 18  | Summarise key results with reference to study objectives                                                                                                                                                     | 13    |
| Limitations              | 19  | Discuss limitations of the study, taking into account sources of potential bias or imprecision. Discuss both direction and magnitude of any potential bias                                                   | 17    |
| Interpretation           | 20  | Give a cautious overall interpretation of results considering objectives, limitations, multiplicity of analyses, results from similar studies, and other relevant evidence                                   | 13-17 |
| Generalisability         | 21  | Discuss the generalisability (external validity) of the study results                                                                                                                                        | 17    |
| <b>Other information</b> |     |                                                                                                                                                                                                              |       |
| Funding                  | 22  | Give the source of funding and the role of the funders for the present study and, if applicable, for the original study on which the present article is based                                                | 18    |

\*Give information separately for cases and controls in case-control studies and, if applicable, for exposed and unexposed groups in cohort and cross-sectional studies.

**Note:** An Explanation and Elaboration article discusses each checklist item and gives methodological background and published examples of transparent reporting. The STROBE checklist is best used in conjunction with this article (freely available on the Web sites of PLoS Medicine at <http://www.plosmedicine.org/>, Annals of Internal Medicine at <http://www.annals.org/>, and Epidemiology at <http://www.epidem.com/>). Information on the STROBE Initiative is available at [www.strobe-statement.org](http://www.strobe-statement.org).
